# Supplementary material for: Future environmental impacts of global hydrogen production
Source: Royal Society of Chemistry journal article supplement (doi:10.1039/d3ee03875k), 2024-01-01
Supplement: d3ee03875k1.pdf [file d3ee03875k1.pdf]

## Supporting Information for

### Future environmental impacts of global hydrogen production

Shijie Wei<sup>\*a</sup> Romain Sacchi<sup>b</sup> Arnold Tukker<sup>ac</sup> Sangwon Suh<sup>d</sup> and Bernhard Steubing<sup>a</sup>

a Institute of Environmental Sciences (CML), Leiden University, 2333 CC Leiden, the Netherlands

b Technology Assessment Group, Laboratory for Energy Systems Analysis, Paul Scherrer Institut, 5232 Villigen, Switzerland

c The Netherlands Organization for Applied Scientific Research TNO, the Netherlands

d Bren School of Environmental Science and Management, University of California, Santa Barbara, Santa Barbara, California 93106, USA

\* Corresponding author. Email: [s.j.wei@cml.leidenuniv.nl](mailto:s.j.wei@cml.leidenuniv.nl)

Contents

- 1. Unit process data of nine H<sub>2</sub> technologies ..... 2
- 2. Global H<sub>2</sub> markets across regions..... 12
  - 2.1 Current H<sub>2</sub> production across regions (2020) ..... 12
  - 2.2 Future H<sub>2</sub> production across regions (until 2050) ..... 13
- 3. Regional scope ..... 17
- 4. Supplementary results ..... 18
  - 4.1 Prospective environmental impacts of H<sub>2</sub> production ..... 18
  - 4.2 Cumulative GHG emissions of H<sub>2</sub> production ..... 26
  - 4.3 Sensitivity analysis ..... 27
- References ..... 29

## 1. Unit process data of nine H<sub>2</sub> technologies

The unit process data of nine H<sub>2</sub> technologies are shown in below. Inputs, which are supplied from own processes, i.e. processes not already contained in the premise pLCI database, are marked with an asterisk (\*).

Table S1. Life cycle inventory of gaseous H<sub>2</sub> production (1 kg, 30 bar, 99.8% purity) by CG.

| Exchanges                                                    | Amount    | Unit          | Data source |
|--------------------------------------------------------------|-----------|---------------|-------------|
| <b>Economic flows</b>                                        |           |               |             |
| market for chemical factory, organics                        | 7.00E-10  | unit          | 1           |
| market for hard coal                                         | 8.51      | kilogram      | 2           |
| market for lime, packed                                      | 1.68E-01  | kilogram      | 1           |
| market for liquid storage tank, chemicals, organics          | 3.97E-09  | unit          | 1           |
| market group for transport, freight train                    | 1.14      | ton kilometer | 1           |
| market for water, deionised                                  | 11.28     | kilogram      | 2           |
| market group for transport, freight, inland waterways, barge | 4.24E-01  | ton kilometer | 1           |
| market (group) for electricity, low voltage                  | -3.18     | kilowatt hour | 2           |
| treatment of hard coal ash, residual material landfill       | -5.05E-01 | kilogram      | 1           |
| treatment of waste gypsum, inert material landfill           | -2.28E-01 | kilogram      | 1           |
| <b>Environmental flows</b>                                   |           |               |             |
| Ammonia (to air)                                             | 6.93E-03  | kilogram      | 1           |
| Carbon dioxide, fossil (to air)                              | 21.42     | kilogram      | 2           |
| Hydrogen chloride (to air)                                   | 1.04E-02  | kilogram      | 1           |

Table S2. Life cycle inventory of gaseous H<sub>2</sub> production (1 kg, 30 bar, 99.8% purity) by CG CCS.

| Exchanges                                                                                      | Amount    | Unit          | Data source |
|------------------------------------------------------------------------------------------------|-----------|---------------|-------------|
| <b>Economic flows</b>                                                                          |           |               |             |
| CO <sub>2</sub> storage/at H <sub>2</sub> production plant, pre. pipeline 400km, storage 3000m | 20.39     | kilogram      | 3           |
| market for chemical factory, organics                                                          | 7.00E-10  | unit          | 1           |
| market for hard coal                                                                           | 9.7       | kilogram      | 3           |
| market for lime, packed                                                                        | 1.68E-01  | kilogram      | 1           |
| market for liquid storage tank, chemicals, organics                                            | 3.97E-09  | unit          | 1           |
| market group for transport, freight train                                                      | 1.14      | ton kilometer | 1           |
| market for water, deionised                                                                    | 38.08     | kilogram      | 3           |
| market (group) for electricity, high voltage                                                   | 1.36      | kilowatt hour | 3           |
| market group for transport, freight, inland waterways, barge                                   | 4.24E-01  | ton kilometer | 1           |
| treatment of hard coal ash, residual material landfill                                         | -5.05E-01 | kilogram      | 1           |
| treatment of waste gypsum, inert material landfill                                             | -2.28E-01 | kilogram      | 1           |
| Selexol (Dimethylether of polyethylene glycol) <sup>a*</sup>                                   | 1.43E-04  | kilogram      | 4           |
| market for heat pump, heat and power co-generation unit, 160kW electrical <sup>a</sup>         | 2.01E-07  | unit          | 4           |
| market for absorption chiller, 100kW <sup>a</sup>                                              | 4.02E-07  | unit          | 4           |
| market for gas turbine, 10MW electrical <sup>a</sup>                                           | 2.01E-07  | unit          | 4           |
| market for liquid storage tank, chemicals, organics <sup>a</sup>                               | 5.57E-08  | unit          | 4           |
| market for pump, 40W <sup>a</sup>                                                              | 2.01E-07  | unit          | 4           |
| treatment of spent solvent mixture, hazardous waste incineration <sup>a</sup>                  | -1.43E-04 | kilogram      | 4           |
| <b>Environmental flows</b>                                                                     |           |               |             |

|                                                                                      |          |             |   |
|--------------------------------------------------------------------------------------|----------|-------------|---|
| Water, cooling, unspecified natural origin (natural resource, in water) <sup>a</sup> | 1.70E+00 | cubic meter | 4 |
| Ammonia (to air)                                                                     | 6.93E-03 | kilogram    | 1 |
| Carbon dioxide, fossil (to air)                                                      | 2.27     | kilogram    | 3 |
| Hydrogen chloride (to air)                                                           | 1.04E-02 | kilogram    | 1 |

a. These processes are used for CO<sub>2</sub> capture. The values are corresponding to capturing 20.39 kg CO<sub>2</sub>.

Table S3. Life cycle inventory of Selexol (1 kg).

| Exchanges                                         | Amount | Unit          |
|---------------------------------------------------|--------|---------------|
| <b>Economic flows</b>                             |        |               |
| market for dimethyl sulfate                       | 0.96   | kilogram      |
| market for methanol                               | 0.16   | kilogram      |
| market for transport, freight train               | 0.6    | ton kilometer |
| market for transport, freight, lorry, unspecified | 0.05   | ton kilometer |
| market for triethylene glycol                     | 0.62   | kilogram      |

Source: Volkart, Bauer, and Boulet<sup>4</sup>

Table S4. Life cycle inventory of gaseous H<sub>2</sub> production (1 kg, 25 bar, 99.97% purity) by NG SMR.

| Exchanges                                           | Amount   | Unit          |
|-----------------------------------------------------|----------|---------------|
| <b>Economic flows</b>                               |          |               |
| market for chemical factory, organics               | 5.35E-10 | unit          |
| market for aluminium oxide, metallurgical           | 5.33E-04 | kilogram      |
| market for chromium oxide, flakes                   | 3.60E-05 | kilogram      |
| market for copper oxide                             | 3.62E-04 | kilogram      |
| market for liquid storage tank, chemicals, organics | 2.55E-09 | unit          |
| market for magnesium oxide                          | 2.80E-05 | kilogram      |
| market for molybdenum trioxide                      | 1.67E-05 | kilogram      |
| market for nickel, class 1                          | 2.03E-04 | kilogram      |
| market for portafar                                 | 3.12E-04 | kilogram      |
| market for quicklime, milled, packed                | 4.80E-05 | kilogram      |
| market for silica sand                              | 1.16E-05 | kilogram      |
| market for water, deionised                         | 7.54E+00 | kilogram      |
| market for zeolite, powder                          | 8.83E-04 | kilogram      |
| market for zinc oxide                               | 3.71E-04 | kilogram      |
| market (group) for electricity, high voltage        | -1.23331 | kilowatt hour |
| market for natural gas, high pressure               | 3.919176 | cubic meter   |
| <b>Environmental flows</b>                          |          |               |
| Acetaldehyde (to air)                               | 3.07E-08 | kilogram      |
| Acetic acid (to air)                                | 4.6E-06  | kilogram      |
| Benzene (to air)                                    | 1.23E-05 | kilogram      |
| Benzo(a)pyrene (to air)                             | 3.07E-10 | kilogram      |
| Butane (to air)                                     | 2.15E-05 | kilogram      |
| Carbon dioxide, fossil (to air)                     | 8.922294 | kilogram      |
| Carbon monoxide, fossil (to air)                    | 6.44E-05 | kilogram      |
| Dinitrogen monoxide (to air)                        | 3.07E-06 | kilogram      |
| Formaldehyde (to air)                               | 3.07E-06 | kilogram      |
| Mercury (to air)                                    | 9.2E-10  | kilogram      |

|                                                                         |          |             |
|-------------------------------------------------------------------------|----------|-------------|
| Methane, fossil (to air)                                                | 6.14E-05 | kilogram    |
| Nitrogen oxides (to air)                                                | 5.49E-04 | kilogram    |
| PAH, polycyclic aromatic hydrocarbons (to air)                          | 3.07E-07 | kilogram    |
| Particulates, < 2.5 um (to air)                                         | 6.14E-06 | kilogram    |
| Pentane (to air)                                                        | 3.68E-05 | kilogram    |
| Propane (to air)                                                        | 6.14E-06 | kilogram    |
| Propionic acid (to air)                                                 | 6.14E-07 | kilogram    |
| Sulfur dioxide (to air)                                                 | 1.69E-05 | kilogram    |
| Toluene (to air)                                                        | 6.14E-06 | kilogram    |
| Water, cooling, unspecified natural origin (natural resource, in water) | 3.80E-01 | cubic meter |

Source: Antonini et al.<sup>5</sup>

Table S5. Life cycle inventory of gaseous H<sub>2</sub> production (1 kg, 25 bar, 99.97% purity) by NG SMR CCS.

| Exchanges                                                                                      | Amount    | Unit          |
|------------------------------------------------------------------------------------------------|-----------|---------------|
| <b>Economic flows</b>                                                                          |           |               |
| CO <sub>2</sub> storage/at H <sub>2</sub> production plant, pre, pipeline 400km, storage 3000m | 5.664958  | kilogram      |
| market for chemical factory, organics                                                          | 5.35E-10  | unit          |
| market for aluminium oxide, metallurgical                                                      | 5.33E-04  | kilogram      |
| market for chromium oxide, flakes                                                              | 3.60E-05  | kilogram      |
| market for copper oxide                                                                        | 3.62E-04  | kilogram      |
| market for diethanolamine                                                                      | 1.93E-04  | kilogram      |
| market for liquid storage tank, chemicals, organics                                            | 2.55E-09  | unit          |
| market for magnesium oxide                                                                     | 2.80E-05  | kilogram      |
| market for molybdenum trioxide                                                                 | 1.67E-05  | kilogram      |
| market for nickel, class 1                                                                     | 2.03E-04  | kilogram      |
| market for portafer                                                                            | 3.12E-04  | kilogram      |
| market for quicklime, milled, packed                                                           | 4.80E-05  | kilogram      |
| market for silica sand                                                                         | 1.16E-05  | kilogram      |
| market for water, deionised                                                                    | 7.54E+00  | kilogram      |
| market for zeolite, powder                                                                     | 8.83E-04  | kilogram      |
| market for zinc oxide                                                                          | 3.71E-04  | kilogram      |
| market (group) for electricity, high voltage                                                   | -2.00E-01 | kilowatt hour |
| market for natural gas, high pressure                                                          | 3.856157  | cubic meter   |
| <b>Environmental flows</b>                                                                     |           |               |
| Acetaldehyde (to air)                                                                          | 2.82E-08  | kilogram      |
| Acetic acid (to air)                                                                           | 4.23E-06  | kilogram      |
| Benzene (to air)                                                                               | 1.13E-05  | kilogram      |
| Benzo(a)pyrene (to air)                                                                        | 2.82E-10  | kilogram      |
| Butane (to air)                                                                                | 1.97E-05  | kilogram      |
| Carbon dioxide, fossil (to air)                                                                | 3.119275  | kilogram      |
| Carbon monoxide, fossil (to air)                                                               | 5.92E-05  | kilogram      |
| Dinitrogen monoxide (to air)                                                                   | 2.82E-06  | kilogram      |
| Formaldehyde (to air)                                                                          | 2.82E-06  | kilogram      |
| Mercury (to air)                                                                               | 8.45E-10  | kilogram      |
| Methane, fossil (to air)                                                                       | 5.63E-05  | kilogram      |
| Nitrogen oxides (to air)                                                                       | 5.04E-04  | kilogram      |
| PAH, polycyclic aromatic hydrocarbons (to air)                                                 | 2.82E-07  | kilogram      |

|                                                                         |          |             |
|-------------------------------------------------------------------------|----------|-------------|
| Particulates, < 2.5 um (to air)                                         | 5.63E-06 | kilogram    |
| Pentane (to air)                                                        | 3.38E-05 | kilogram    |
| Propane (to air)                                                        | 5.63E-06 | kilogram    |
| Propionic acid (to air)                                                 | 5.63E-07 | kilogram    |
| Sulfur dioxide (to air)                                                 | 1.55E-05 | kilogram    |
| Toluene (to air)                                                        | 5.63E-06 | kilogram    |
| Water, cooling, unspecified natural origin (natural resource, in water) | 3.80E-01 | cubic meter |

Source: Antonini et al.<sup>5</sup>

Table S6. Life cycle inventory of gaseous H<sub>2</sub> production (1 kg, 26 bar, 99.97% purity) by BG.

| Exchanges                                            | Amount    | Unit          |
|------------------------------------------------------|-----------|---------------|
| <b>Economic flows</b>                                |           |               |
| market for liquid storage tank, chemicals, organics  | 2.55E-09  | unit          |
| market for water, deionised                          | 15.90552  | kilogram      |
| market for wood chips, wet, measured as dry mass     | 11.6966   | kilogram      |
| market (group) for electricity, low voltage          | 1.368832  | kilowatt hour |
| synthetic gas factory construction                   | 5.35E-10  | unit          |
| treatment of wastewater, average, capacity 1E9l/year | -1.24E-02 | cubic meter   |
| <b>Environmental flows</b>                           |           |               |
| Carbon dioxide, non-fossil (to air)                  | 21.19664  | kilogram      |

Source: Antonini et al.<sup>6</sup>

Table S7. Life cycle inventory of gaseous H<sub>2</sub> production (1 kg, 26 bar, 99.97% purity) by BG CCS.

| Exchanges                                                                                      | Amount    | Unit          | Data source |
|------------------------------------------------------------------------------------------------|-----------|---------------|-------------|
| <b>Economic flows</b>                                                                          |           |               |             |
| CO <sub>2</sub> storage/at H <sub>2</sub> production plant, pre, pipeline 400km, storage 3000m | 18.02775  | kilogram      | 6           |
| market for liquid storage tank, chemicals, organics                                            | 2.55E-09  | unit          | 6           |
| market for water, deionised <sup>a</sup>                                                       | 16.3391   | kilogram      | 6, 7        |
| market for wood chips, wet, measured as dry mass                                               | 11.6966   | kilogram      | 6           |
| market (group) for electricity, low voltage                                                    | 4.756841  | kilowatt hour | 6           |
| market for diethanolamine                                                                      | 1.76E-04  | kilogram      | 7           |
| synthetic gas factory construction                                                             | 5.35E-10  | unit          | 6           |
| treatment of wastewater, average, capacity 1E9l/year <sup>a</sup>                              | -1.29E-02 | cubic meter   | 6, 7        |
| <b>Environmental flows</b>                                                                     |           |               |             |
| Water, cooling, unspecified natural origin (from natural resource) <sup>a</sup>                | 1.496476  | cubic meter   | 7           |
| Carbon dioxide, non-fossil (to air)                                                            | 3.168898  | kilogram      | 6           |

a. The added amounts compared with the BG process are corresponding to capturing 18.02775 CO<sub>2</sub>.

Table S8. Life cycle inventory of gaseous H<sub>2</sub> production (1 kg, 30 bar, 99.99% purity) by AE powered by grid electricity.

| Exchanges                                                | Amount   | Unit          | Data source |
|----------------------------------------------------------|----------|---------------|-------------|
| <b>Economic flows</b>                                    |          |               |             |
| electrolyzer, AE, Balance of Plant*                      | 2.99E-07 | unit          | Calculation |
| electrolyzer, AE, Stack*                                 | 8.97E-07 | unit          | Calculation |
| market for potassium hydroxide                           | 3.70E-03 | kilogram      | 8           |
| market (group) for electricity, low voltage <sup>a</sup> | 49.75    | kilowatt hour | Calculation |

|                                                                         |        |             |   |
|-------------------------------------------------------------------------|--------|-------------|---|
| market for water, deionised                                             | 12     | kilogram    | 9 |
| <b>Environmental flows</b>                                              |        |             |   |
| Water, cooling, unspecified natural origin (natural resource, in water) | 0.0881 | cubic meter | 8 |
| Oxygen (to air)                                                         | 8      | kilogram    | 8 |

a. In the sensitivity analysis, for solar PV, onshore wind and hydro power, the processes of power generation “electricity production, photovoltaic, 570kWp open ground installation, multi-Si”, “electricity production, wind, 1-3MW turbine, onshore” and “electricity production, hydro, reservoir, tropical region (alpine region)” are used. If the process of hydro power from reservoir is not available in specific region, the process of “electricity production, hydro, run-of-river” is used.

Table S9. Life cycle inventory of AE's BoP production (1 MW).

| Exchanges                                                     | Amount  | Unit              | Data source |
|---------------------------------------------------------------|---------|-------------------|-------------|
| <b>Economic flows</b>                                         |         |                   |             |
| market for cast iron                                          | 716.1   | kilogram          | 8           |
| market for concrete, 35MPa                                    | 7.7     | cubic meter       | 8           |
| market for electronics, for control units                     | 100     | kilogram          | 8           |
| market for ethylene glycol                                    | 7       | kilogram          | 8           |
| market for extrusion, plastic pipes                           | 464.6   | kilogram          | 8           |
| market for glass fibre                                        | 464.6   | kilogram          | 8           |
| market for injection moulding                                 | 3       | kilogram          | 8           |
| market for aluminium, wrought alloy                           | 160     | kilogram          | 8           |
| market for copper, cathode                                    | 616.7   | kilogram          | 8           |
| market for polyethylene, low density, granulate               | 467.4   | kilogram          | 8           |
| market for reinforcing steel                                  | 5134.4  | kilogram          | 8           |
| market for sheet rolling, aluminium                           | 100     | kilogram          | 8           |
| market for sheet rolling, chromium steel                      | 6697.8  | kilogram          | 8           |
| market for sheet rolling, steel                               | 10130   | kilogram          | 8           |
| market for steel, chromium steel 18/8, hot rolled             | 6697.8  | kilogram          | 8           |
| market for steel, low-alloyed, hot rolled                     | 6075.6  | kilogram          | 8           |
| market for tube insulation, elastomere                        | 207.9   | kilogram          | 8           |
| market for welding, arc, steel                                | 29      | meter             | 8           |
| market for wire drawing, copper                               | 616.7   | kilogram          | 8           |
| market (group) for electricity, low voltage                   | 37113.5 | kilowatt hour     | 8           |
| <b>Environmental flows</b>                                    |         |                   |             |
| Transformation, from industrial area (natural resource, land) | 135     | square meter      | 10          |
| Transformation, to industrial area (natural resource, land)   | 135     | square meter      | 10          |
| Occupation, industrial area (natural resource, land)          | 2700    | square meter-year | 10          |

Source: Gerloff<sup>6</sup>

Table S10. Life cycle inventory of AE's stack production (1 MW).

| Exchanges                                         | Amount  | Unit     |
|---------------------------------------------------|---------|----------|
| <b>Economic flows</b>                             |         |          |
| market for sheet rolling, chromium steel          | 20194.4 | kilogram |
| market for steel, chromium steel 18/8, hot rolled | 20194.4 | kilogram |
| market for nickel, class 1                        | 2884.9  | kilogram |
| market for tetrafluoroethylene                    | 144.2   | kilogram |
| market for polysulfone                            | 48.8    | kilogram |
| market for zirconium oxide                        | 73      | kilogram |

|                                             |         |               |
|---------------------------------------------|---------|---------------|
| market (group) for electricity, low voltage | 95553.3 | kilowatt hour |
|---------------------------------------------|---------|---------------|

Source: Gerloff<sup>8</sup>

Table S11. Life cycle inventory of gaseous H<sub>2</sub> production (1 kg, 30 bar, 99.99% purity) by PEM powered by grid electricity.

| Exchanges                                                               | Amount   | Unit          | Data source |
|-------------------------------------------------------------------------|----------|---------------|-------------|
| <b>Economic flows</b>                                                   |          |               |             |
| electrolyzer, PEM, Balance of Plant*                                    | 3.45E-07 | unit          | Calculation |
| electrolyzer, PEM, Stack*                                               | 1.04E-06 | unit          | Calculation |
| market (group) for electricity, low voltage                             | 57.47    | kilowatt hour | Calculation |
| market for water, deionised                                             | 12       | kilogram      | 9           |
| <b>Environmental flows</b>                                              |          |               |             |
| Water, cooling, unspecified natural origin (natural resource, in water) | 0.0881   | cubic meter   | 8           |
| Oxygen                                                                  | 8        | kilogram      | 8           |

Table S12. Life cycle inventory of PEM's BoP production (1 MW).

| Exchanges                                                     | Amount | Unit              | Data source |
|---------------------------------------------------------------|--------|-------------------|-------------|
| <b>Economic flows</b>                                         |        |                   |             |
| market for aluminium, wrought alloy                           | 260    | kilogram          | 8           |
| market for cast iron                                          | 600    | kilogram          | 8           |
| market for copper, anode                                      | 345    | kilogram          | 8           |
| market for electronics, for control units                     | 100    | kilogram          | 8           |
| market for ethylene glycol                                    | 7      | kilogram          | 8           |
| market for extrusion, plastic pipes                           | 464.6  | kilogram          | 8           |
| market for injection moulding                                 | 300    | kilogram          | 8           |
| market for lubricating oil                                    | 100    | kilogram          | 8           |
| market for polyethylene, low density, granulate               | 464.6  | kilogram          | 8           |
| market for polypropylene, granulate                           | 300    | kilogram          | 8           |
| market for reinforcing steel                                  | 3312.3 | kilogram          | 8           |
| market for sheet rolling, aluminium                           | 200    | kilogram          | 8           |
| market for sheet rolling, chromium steel                      | 4327   | kilogram          | 8           |
| market for sheet rolling, copper                              | 100    | kilogram          | 8           |
| market for sheet rolling, steel                               | 5382.3 | kilogram          | 8           |
| market for steel, chromium steel 18/8, hot rolled             | 4327   | kilogram          | 8           |
| market for steel, low-alloyed                                 | 3150   | kilogram          | 8           |
| market for tube insulation, elastomere                        | 115    | kilogram          | 8           |
| market for welding, arc, steel                                | 29     | meter             | 8           |
| market for wire drawing, copper                               | 245    | kilogram          | 8           |
| market for zeolite, powder                                    | 100    | kilogram          | 8           |
| market for concrete, 35MPa                                    | 2.3    | cubic meter       | 8           |
| market (group) for electricity, low voltage                   | 50000  | kilowatt hour     | 8           |
| <b>Environmental flows</b>                                    |        |                   |             |
| Transformation, from industrial area (natural resource, land) | 105    | square meter      | 10          |
| Transformation, to industrial area (natural resource, land)   | 105    | square meter      | 10          |
| Occupation, industrial area (natural resource, land)          | 2100   | square meter-year | 10          |



Table S13. Life cycle inventory of PEM's stack production (1 MW).

| Exchanges                                         | Amount   | Unit          | Data source |
|---------------------------------------------------|----------|---------------|-------------|
| <b>Economic flows</b>                             |          |               |             |
| market for titanium                               | 528      | kilogram      | 11          |
| market for aluminium, wrought alloy               | 27       | kilogram      | 11          |
| market for sheet rolling, aluminium               | 27       | kilogram      | 11          |
| market for steel, chromium steel 18/8, hot rolled | 100      | kilogram      | 11          |
| market for sheet rolling, chromium steel          | 100      | kilogram      | 11          |
| market for copper, anode                          | 4.5      | kilogram      | 11          |
| market for sheet rolling, copper                  | 4.5      | kilogram      | 11          |
| market for activated carbon, granular             | 9        | kilogram      | 11          |
| market for tetrafluoroethylene                    | 9.184    | kilogram      | 11, 12      |
| market for sulfuric acid                          | 6.816    | kilogram      | 11, 12      |
| market for platinum                               | 0.075    | kilogram      | 11          |
| market for synthetic rubber                       | 4.8      | kilogram      | 8           |
| market for iridium*                               | 0.75     | kilogram      | 11          |
| market (group) for electricity, low voltage       | 103890.8 | kilowatt hour | 8           |

Table S14. Life cycle inventory of market for iridium (1 kg).

| Exchanges                                                             | Amount   | Unit              |
|-----------------------------------------------------------------------|----------|-------------------|
| <b>Economic flows</b>                                                 |          |                   |
| market for electricity, low voltage                                   | 54212.21 | kilowatt hour     |
| <b>Environmental flows</b>                                            |          |                   |
| Iridium, in ground (natural resource, in ground)                      | 1        | kilogram          |
| Occupation, arable land, unspecified use (natural resource, land)     | 41.7465  | square meter-year |
| Occupation, forest, unspecified (natural resource, land)              | 41.7465  | square meter-year |
| Occupation, mineral extraction site (natural resource, land)          | 635.274  | square meter-year |
| Transformation, from mineral extraction site (natural resource, land) | 4.882    | square meter      |
| Transformation, to mineral extraction site (natural resource, land)   | 4.882    | square meter      |
| Water, unspecified natural origin (natural resource, in ground)       | 199.7499 | cubic meter       |
| Ethane, 1,1,1-trichloro-, HCFC-140 (to air)                           | 8.02E-10 | kilogram          |
| Ethane, 1,2-dichloro- (to air)                                        | 4.56E-04 | kilogram          |
| Arsenic (to air)                                                      | 3.38E-03 | kilogram          |
| Benzo(a)pyrene (to air)                                               | 3.03E-02 | kilogram          |
| Benzene (to air)                                                      | 3.03E-02 | kilogram          |
| Lead (to air)                                                         | 1.81E-02 | kilogram          |
| Cadmium (to air)                                                      | 1.43E-04 | kilogram          |
| Methane, trichlorofluoro-, CFC-11 (to air)                            | 1.44E-04 | kilogram          |
| Methane, non-fossil (to air)                                          | 7.81E-02 | kilogram          |
| Methane, fossil (to air)                                              | 19.13    | kilogram          |
| Hydrocarbons, chlorinated (to air)                                    | 8.10E-04 | kilogram          |
| Chromium (to air)                                                     | 6.93E-03 | kilogram          |
| Carbon monoxide, fossil (to air)                                      | 7.159    | kilogram          |
| Carbon dioxide, fossil (to air)                                       | 11146.62 | kilogram          |
| Carbon dioxide, non-fossil (to air)                                   | 412.196  | kilogram          |
| Methane, dichloro-, HCC-30 (to air)                                   | 8.76E-08 | kilogram          |

|                                                                             |          |          |
|-----------------------------------------------------------------------------|----------|----------|
| Dioxins, measured as 2,3,7,8-tetrachlorodibenzo-p-dioxin (to air)           | 5.73E-09 | kilogram |
| Ethane (to air)                                                             | 5.56E-03 | kilogram |
| Particulates, > 2.5 um, and < 10um (to air)                                 | 36.7     | kilogram |
| Formaldehyde (to air)                                                       | 4.86E-02 | kilogram |
| Hydrogen sulfide (to air)                                                   | 1.91E-02 | kilogram |
| Hydrochloric acid (to air)                                                  | 4.99E-01 | kilogram |
| Benzene, hexachloro- (to air)                                               | 4.70E-09 | kilogram |
| Hydrogen fluoride (to air)                                                  | 4.87E-02 | kilogram |
| Ethane, 1,1,1,2-tetrafluoro-, HFC-134a (to air)                             | 2.10E-07 | kilogram |
| Copper (to air)                                                             | 2.56E-02 | kilogram |
| Dinitrogen monoxide (to air)                                                | 1.06     | kilogram |
| Ammonia (to air)                                                            | 3.52E-01 | kilogram |
| Nickel (to air)                                                             | 2.69E-02 | kilogram |
| NM VOC, non-methane volatile organic compounds, unspecified origin (to air) | 26.859   | kilogram |
| Nitrogen oxides (to air)                                                    | 30.635   | kilogram |
| Polychlorinated biphenyls (to air)                                          | 9.52E-10 | kilogram |
| Phenol, pentachloro- (to air)                                               | 2.46E-06 | kilogram |
| Perfluoropentane (to air)                                                   | 3.43E-06 | kilogram |
| PAH, polycyclic aromatic hydrocarbons (to air)                              | 1.50E-03 | kilogram |
| Mercury (to air)                                                            | 2.62E-04 | kilogram |
| Sulfur hexafluoride (to air)                                                | 4.43E-05 | kilogram |
| Sulfur dioxide (to air)                                                     | 2172.255 | kilogram |
| Methane, tetrachloro-, R-10 (to air)                                        | 1.02E-04 | kilogram |
| Zinc (to air)                                                               | 6.79E-02 | kilogram |
| Arsenic, ion (to water)                                                     | 2.75E-01 | kilogram |
| Lead (to water)                                                             | 2.67E-01 | kilogram |
| Cadmium, ion (to water)                                                     | 2.97E-02 | kilogram |
| Chloride (to water)                                                         | 34.494   | kilogram |
| Chromium, ion (to water)                                                    | 5.73E-02 | kilogram |
| Cyanide (to water)                                                          | 6.65E-01 | kilogram |
| Fluoride (to water)                                                         | 5.93E-01 | kilogram |
| AOX, Adsorbable Organic Halogen as Cl (to water)                            | 4.48E-05 | kilogram |
| Copper, ion (to water)                                                      | 8.41E-01 | kilogram |
| Ammonium, ion (to water)                                                    | 6.54E-02 | kilogram |
| Nickel (to water)                                                           | 4.51     | kilogram |
| Nitrate (to water)                                                          | 6.80E-02 | kilogram |
| Tin, ion (to water)                                                         | 1.50E-05 | kilogram |
| TOC, Total Organic Carbon (to water)                                        | 10.576   | kilogram |
| Phenol (to water)                                                           | 2.00E-03 | kilogram |
| PAH, polycyclic aromatic hydrocarbons (to water)                            | 1.50E-04 | kilogram |
| Mercury (to water)                                                          | 3.53E-03 | kilogram |
| Suspended solids, unspecified (to water)                                    | 6.86E-01 | kilogram |
| Sulfate (to water)                                                          | 272.715  | kilogram |
| Phosphorus (to water)                                                       | 1.73E-01 | kilogram |
| Nitrogen (to water)                                                         | 2.656    | kilogram |
| Zinc, ion (to water)                                                        | 7.043    | kilogram |

Source: ProBas<sup>13</sup>

Table S15. Life cycle inventory of gaseous H<sub>2</sub> production (1 kg, 30 bar, 99.9% purity) by SOEC powered by grid electricity.

| Exchanges                                                               | Amount   | Unit          | Data source |
|-------------------------------------------------------------------------|----------|---------------|-------------|
| <b>Economic flows</b>                                                   |          |               |             |
| electrolyzer, SOEC, Balance of Plant*                                   | 2.57E-07 | unit          | Calculation |
| electrolyzer, SOEC, Stack*                                              | 2.31E-06 | unit          | Calculation |
| market (group) for electricity, low voltage                             | 42.73    | kilowatt hour | Calculation |
| market for heat, district or industrial, other than natural gas         | 18.864   | megajoule     | 8           |
| market for water, deionised                                             | 12       | kilogram      | 9           |
| <b>Environmental flows</b>                                              |          |               |             |
| Water, cooling, unspecified natural origin (natural resource, in water) | 0.6447   | cubic meter   | 8           |
| Oxygen (to air)                                                         | 8        | kilogram      | 8           |

Table S16. Life cycle inventory of SOEC's BoP production (1 MW).

| Exchanges                                                     | Amount  | Unit              | Data source |
|---------------------------------------------------------------|---------|-------------------|-------------|
| <b>Economic flows</b>                                         |         |                   |             |
| market for cast iron                                          | 3000    | kilogram          | 8           |
| market for acrylonitrile-butadiene-styrene copolymer          | 1.4     | kilogram          | 8           |
| market for concrete, 35MPa                                    | 2.3     | cubic meter       | 8           |
| market for electronics, for control units                     | 100     | kilogram          | 8           |
| market for ethylene glycol                                    | 35      | kilogram          | 8           |
| market for extrusion, plastic pipes                           | 534     | kilogram          | 8           |
| market for injection moulding                                 | 1.4     | kilogram          | 8           |
| market for aluminium, wrought alloy                           | 401     | kilogram          | 8           |
| market for copper, cathode                                    | 428.5   | kilogram          | 8           |
| market for polyethylene, low density, granulate               | 534     | kilogram          | 8           |
| market for reinforcing steel                                  | 13730.6 | kilogram          | 8           |
| market for sheet rolling, aluminium                           | 100     | kilogram          | 8           |
| market for sheet rolling, chromium steel                      | 16621.4 | kilogram          | 8           |
| market for sheet rolling, steel                               | 12081.2 | kilogram          | 8           |
| market for steel, chromium steel 18/8, hot rolled             | 16621.4 | kilogram          | 8           |
| market for steel, low-alloyed, hot rolled                     | 2250    | kilogram          | 8           |
| market for steel, low-alloyed                                 | 1503.6  | kilogram          | 8           |
| market for tube insulation, elastomere                        | 176.6   | kilogram          | 8           |
| market for welding, arc, steel                                | 33.3    | meter             | 8           |
| market for wire drawing, copper                               | 428.5   | kilogram          | 8           |
| market (group) for electricity, low voltage                   | 76420.2 | kilowatt hour     | 8           |
| <b>Environmental flows</b>                                    |         |                   |             |
| Transformation, from industrial area (natural resource, land) | 55      | square meter      | 14          |
| Transformation, to industrial area (natural resource, land)   | 55      | square meter      | 14          |
| Occupation, industrial area (natural resource, land)          | 1100    | square meter-year | 14          |

Table S17. Life cycle inventory of SOEC's stack production (1 MW).

| Exchanges                                 | Amount | Unit     |
|-------------------------------------------|--------|----------|
| <b>Economic flows</b>                     |        |          |
| market for aluminium oxide, metallurgical | 6.4    | kilogram |

|                                                   |          |               |
|---------------------------------------------------|----------|---------------|
| market for barium oxide                           | 6.4      | kilogram      |
| market for boric oxide                            | 6.4      | kilogram      |
| Lanthanum strontium manganite (LSM)*              | 2.1      | kilogram      |
| market for cerium oxide                           | 91.5     | kilogram      |
| market for nickel, class 1                        | 144.1    | kilogram      |
| market for praseodymium oxide                     | 9        | kilogram      |
| market for samarium-europium-gadolinium oxide     | 37.7     | kilogram      |
| market for sheet rolling, chromium steel          | 8976.1   | kilogram      |
| market for silicone product                       | 6.4      | kilogram      |
| market for steel, chromium steel 18/8, hot rolled | 8976.1   | kilogram      |
| market for zirconium oxide                        | 170.7    | kilogram      |
| market (group) for electricity, low voltage       | 122224.4 | kilowatt hour |

Source: Gerloff<sup>8</sup>

Table S18. Life cycle inventory of LSM production (1 kg).

| Exchanges                                                    | Amount   | Unit          |
|--------------------------------------------------------------|----------|---------------|
| <b>Economic flows</b>                                        |          |               |
| market for lanthanum oxide                                   | 5.04E-01 | kilogram      |
| market for manganese                                         | 8.62E-02 | kilogram      |
| market for strontium carbonate                               | 5.51E-01 | kilogram      |
| market for nitric acid, without water, in 50% solution state | 1.3181   | kilogram      |
| market for chloroacetic acid                                 | 1.667388 | kilogram      |
| market for ammonia, anhydrous, liquid                        | 3.00E-01 | kilogram      |
| market for water, deionised                                  | 8.833922 | kilogram      |
| market group for electricity, low voltage                    | 15.68021 | kilowatt hour |

Source: Staffell et al.<sup>15</sup>

For the delivery purity and pressure of the H<sub>2</sub> from water electrolysis, only the information about PEM (industry grade N5.0-99.999% and 30 bar) can be available from the reference Bareiß et al.<sup>11</sup> that we directly used. We further checked other references to clarify these information about AE and SOEC and made a comparison to ensure the value used in our paper is reasonable. The H<sub>2</sub> produced by AE is delivered at 99.999% purity and 30 bar pressure with the system electrical efficiency of 53-70%, as mentioned in the Table5-1 in the report of Smolinka et al.<sup>16</sup> This electrical efficiency was cited in the research of Zhang et al.,<sup>17</sup> which is the main source reference of the AE's stack and BoP in the Gerloff.<sup>8</sup> Purity requirements vary significantly from different applications.<sup>18</sup> Although 99.999% purity of H<sub>2</sub> produced by AE and PEM can be achieved based on the electrical efficiency used in this paper, the mid-range value of 99.99% (N4.0) purity from manufacturer (between 99.9%-N3.0 and 99.999%)<sup>19-22</sup> was used as the target purity due to lack of specific users. Gerloff<sup>8</sup> used Häfele et al.<sup>23</sup>'s LCI of SOEC's stack, whose operating pressure is 1 bar, and added H<sub>2</sub> compressors in SOEC's BoP. In other references using the similar SOEC system, the generated H<sub>2</sub> (99.9% purity) is generally compressed from 1 bar to 30 bar, with the system electrical efficiency of SOEC between 75% and 88%.<sup>24-27</sup> The target delivery purity and pressure of the H<sub>2</sub> produced by water electrolysis are shown in Table S19.

Table S19. The system electrical efficiency of the target H<sub>2</sub> product of the water electrolysis.

| Parameters                                                      | AE    | PEM   | SOEC  |
|-----------------------------------------------------------------|-------|-------|-------|
| Electrical efficiency used in this paper (%)                    | 67    | 58    | 78    |
| Delivery pressure of H <sub>2</sub> (bar)                       | 30    | 30    | 30    |
| Delivery purity of H <sub>2</sub> (%)                           | 99.99 | 99.99 | 99.9  |
| Electrical efficiency for the target H <sub>2</sub> product (%) | 53-70 | 50-70 | 75-88 |

Table S20. LCI of 1 MW PEM stack production in the Middle East and the USA in 2030 and 2050 broken down into technology improvements (likely material reductions), regional variations (where the regional electricity mix is used), and other inputs that do not change over time and region.

| Economic flows                                    | Unit | Location | Amount in 2030 | Amount in 2050 |
|---------------------------------------------------|------|----------|----------------|----------------|
| <b>Technology improvements</b>                    |      |          |                |                |
| market for titanium                               | kg   | GLO      | 213.69         | 35             |
| market for steel, chromium steel 18/8, hot rolled | kg   | GLO      | 73.68          | 40             |
| market for sheet rolling, chromium steel          | kg   | GLO      | 73.68          | 40             |
| market for activated carbon, granular             | kg   | GLO      | 7.14           | 4.5            |
| market for tetrafluoroethylene (Nafion)           | kg   | GLO      | 4.59           | 1.148          |
| market for sulfuric acid (Nafion)                 | kg   | RoW      | 3.41           | 0.852          |
| market for platinum                               | kg   | GLO      | 0.05           | 0.02           |
| market for iridium                                | kg   | GLO      | 0.26           | 0.03           |
| <b>Regional variations</b>                        |      |          |                |                |
| market for electricity, low voltage               | kWh  | MEA/USA  | 103890.8       | 103890.8       |
| <b>Others</b>                                     |      |          |                |                |
| market for aluminium, wrought alloy               | kg   | GLO      | 27             | 27             |
| market for sheet rolling, aluminium               | Kg   | GLO      | 27             | 27             |
| market for copper, anode                          | kg   | GLO      | 4.5            | 4.5            |
| market for sheet rolling, copper                  | kg   | GLO      | 4.5            | 4.5            |
| market for synthetic rubber                       | kg   | GLO      | 4.8            | 4.8            |

## 2. Global H<sub>2</sub> markets across regions

### 2.1 Current H<sub>2</sub> production across regions (2020)

For the IEA's regions where no data of H<sub>2</sub> production by CG and NG SMR in 2020 was available, the following assumptions were made:

Coal is used as the feedstock of H<sub>2</sub> production in limited regions including China, India, Japan, Southeast Asia, Africa and Rest of Asia Pacific.<sup>28</sup> For Southeast Asia, Africa and Rest of Asia Pacific, where there is no data of H<sub>2</sub> production amount of CG, their values are generated by multiplying the remaining global total H<sub>2</sub> production amount by CG excluding the known amount of China, India and Japan, by the ratios of their respective coal supply amount in 2020.<sup>29</sup>

Australia's hydrogen production was around 0.65 Mt and virtually all of this H<sub>2</sub> is made using NG SMR.<sup>30</sup> For the 1.8 Mt H<sub>2</sub> produced and used in Korea in 2020, 40% was produced from NG SMR, with the remaining 60% obtained as by-product from various sources.<sup>31</sup> The NG SMR proportion in the H<sub>2</sub> market of Rest of Asia Pacific was set as the same as the weighted average value for Australia

and Korea, which are dominated by H<sub>2</sub> producing countries in this region. Russia has no official statistics of its H<sub>2</sub> market,<sup>32</sup> but what can be confirmed is that there is practically no government or industry program for producing H<sub>2</sub> from coal.<sup>33</sup> Thus, the H<sub>2</sub> market of Russia is assumed to consist of only NG SMR technology excluding the by-product H<sub>2</sub>. The Rest of Eurasia has a similar situation. So the global remaining H<sub>2</sub> production amount of NG SMR excluding other 13 regions were proportionally assigned to Russia and the Rest of Eurasia according their respective total H<sub>2</sub> production amount.

## 2.2 Future H<sub>2</sub> production across regions (until 2050)

The future regional dedicated H<sub>2</sub> production volumes in the IEA's STEPS, APS and NZE scenarios were derived via the following steps. For the H<sub>2</sub> production volumes from 2020 to 2050 in the STEPS and APS, the IEA provides global total H<sub>2</sub> production volumes and specific values of CG CCS, NG SMR CCS, water electrolysis and bioenergy (lacking CG and NG SMR), as well as the total production volumes including by-product H<sub>2</sub> of 15 regions.<sup>29</sup> At first, the fraction of the global H<sub>2</sub> production volumes of CG and NG SMR in 2020 was used to distinguish between CG and NG SMR in the residual production volumes (excluding by-product H<sub>2</sub>, which was considered unchanged in the future). After getting the production volumes of different H<sub>2</sub> technologies at the global level, we can then assign these values to 15 regions.

Our further assumption is that the regional fractions in CG and NG SMR after 2020 will change with the same trend of their total H<sub>2</sub> production volumes<sup>29</sup> (The regional fractions are shown in Table S20-S23). Thus, the production volume of CG and NG SMR after 2020 in each region can be obtained by multiplying the global total production volume of CG and NG SMR with regional fractions. Above fractions were also used for assigning the production volume of CG CCS and NG SMR CCS. For bioenergy-based H<sub>2</sub> technology, the regional fraction of the total H<sub>2</sub> production volume was used to assign it due to lack of starting values in 2020 and reference basis. At last, the production volume of water electrolysis in each region over time can be obtained by subtracting the above known amount and by-product H<sub>2</sub> from the regional total H<sub>2</sub> production volume. Water electrolysis includes AE, PEM and SOEC. If there is no clear classification for one region in 2020, the global average proportion, 61%, 31% and 8% for AE, PEM and SOEC would be adopted as the alternative.<sup>31</sup> PEM is currently one of the two commercially available electrolyzer technologies together with AE.<sup>34</sup> On the one hand, the share of AE in the total installed capacity of announced projects remains at around 60% for the next five years, but decreases afterwards, so that by 2030 the total capacity could be equally split between AE and PEM electrolyzers.<sup>35</sup> On the other hand, Schmidt et al.<sup>36</sup> found that experts believed PEM would be the dominant electrolysis technology by as early as 2030. Moreover, PEM has a simpler balance of plant and produces H<sub>2</sub> at a higher pressure than AE, which means lower energy requirements for compression.<sup>10</sup> Studies also show that PEM might be more future-proof than AE; for example, PEM electrolyzers exhibit a higher power-density per footprint ratio compared to AE

electrolyzers, making the overall system footprint less space-consuming,<sup>37</sup> and PEM is shown to exhibit higher flexibility and can be installed with variable power (solar photovoltaic and wind) without impacting the electrolyzer performance.<sup>38</sup> Thus, a conservative market share of 60% for PEM in water electrolysis in 2050 is assumed. The SOEC is simply assumed to increase 1% every 5 years from 2020 to 2050. At the same time, the remaining proportion is AE's market share.

For the NZE scenario, only the global H<sub>2</sub> production volume by fossil fuel, CCS, bioenergy, water electrolysis and by-product is available and there is no regional data.<sup>39</sup> Thus, the source of coal and natural gas in fossil fuel and CCS were distinguished by the fractions used in the APS scenario. At the same time, the regional fractions of the global H<sub>2</sub> production from 2020 to 2050 of the APS scenario were used to get the regional total production volumes in the NZE scenario. Other steps were also consistent with the APS scenario. BG CCS was only adopted in the NZE scenario from 2040 with a fraction of 1% in bioenergy-based H<sub>2</sub> production volume and can achieve no more than 5% by 2050.<sup>29</sup> The annual H<sub>2</sub> production volumes by various technologies in 15 regions between 2020 and 2050 under three scenarios are shown in Figure S1.

Table S21. The regional fraction of CG and CG CCS between 2020 and 2050 in the STEPS scenario.

| Regions              | 2020  | 2025  | 2030  | 2035  | 2040  | 2045  | 2050  |
|----------------------|-------|-------|-------|-------|-------|-------|-------|
| Africa               | 1.7%  | 1.9%  | 2.0%  | 2.2%  | 2.4%  | 2.5%  | 2.7%  |
| China                | 84.7% | 84.3% | 83.9% | 82.6% | 81.3% | 80.1% | 79.1% |
| India                | 7.2%  | 7.5%  | 7.8%  | 8.6%  | 9.4%  | 10.1% | 10.7% |
| Japan                | 0.5%  | 0.5%  | 0.5%  | 0.5%  | 0.5%  | 0.6%  | 0.6%  |
| Southeast Asia       | 2.9%  | 3.0%  | 3.0%  | 3.2%  | 3.4%  | 3.5%  | 3.7%  |
| Rest of Asia Pacific | 3.0%  | 2.9%  | 2.7%  | 2.9%  | 3.0%  | 3.2%  | 3.3%  |

Table S22. The regional fraction of CG and CG CCS between 2020 and 2050 in the APS and NZE scenario.

|                      | 2020  | 2025  | 2030  | 2035  | 2040  | 2045  | 2050  |
|----------------------|-------|-------|-------|-------|-------|-------|-------|
| Africa               | 1.7%  | 1.8%  | 1.9%  | 2.1%  | 2.3%  | 2.4%  | 2.5%  |
| China                | 84.7% | 84.6% | 84.4% | 81.7% | 79.9% | 78.6% | 77.7% |
| India                | 7.2%  | 7.2%  | 7.1%  | 8.1%  | 8.8%  | 9.2%  | 9.5%  |
| Japan                | 0.5%  | 0.6%  | 0.6%  | 0.8%  | 0.9%  | 0.9%  | 1.0%  |
| Southeast Asia       | 2.9%  | 2.9%  | 2.9%  | 3.2%  | 3.4%  | 3.5%  | 3.6%  |
| Rest of Asia Pacific | 3.0%  | 3.0%  | 3.0%  | 4.1%  | 4.8%  | 5.3%  | 5.7%  |

Table S23. The regional fraction of NG SMR and NG SMR CCS between 2020 and 2050 in the STEPS scenario.

|                                   | 2020  | 2025  | 2030  | 2035  | 2040  | 2045  | 2050  |
|-----------------------------------|-------|-------|-------|-------|-------|-------|-------|
| United States                     | 17.9% | 17.4% | 16.9% | 16.7% | 16.5% | 16.4% | 16.2% |
| Rest of North America             | 4.7%  | 4.4%  | 4.2%  | 4.1%  | 4.0%  | 3.9%  | 3.9%  |
| Brazil                            | 0.3%  | 0.5%  | 0.6%  | 0.7%  | 0.8%  | 0.9%  | 1.0%  |
| Rest of Central and South America | 4.2%  | 4.3%  | 4.4%  | 4.8%  | 5.1%  | 5.3%  | 5.6%  |
| European Union                    | 8.8%  | 7.7%  | 6.9%  | 6.4%  | 6.0%  | 5.7%  | 5.4%  |
| Rest of Europe                    | 2.4%  | 2.4%  | 2.3%  | 2.3%  | 2.3%  | 2.3%  | 2.3%  |
| Africa                            | 4.7%  | 5.1%  | 5.5%  | 5.8%  | 6.1%  | 6.4%  | 6.6%  |
| Middle East                       | 18.3% | 20.0% | 21.3% | 20.9% | 20.6% | 20.3% | 20.0% |

|                      |       |       |       |       |       |       |       |
|----------------------|-------|-------|-------|-------|-------|-------|-------|
| Russia               | 5.2%  | 4.5%  | 4.0%  | 3.8%  | 3.6%  | 3.5%  | 3.3%  |
| Rest of Eurasia      | 0.4%  | 0.4%  | 0.4%  | 0.4%  | 0.3%  | 0.3%  | 0.3%  |
| China                | 11.4% | 11.3% | 11.2% | 10.6% | 10.2% | 9.8%  | 9.4%  |
| India                | 11.5% | 12.1% | 12.4% | 13.3% | 14.1% | 14.7% | 15.3% |
| Japan                | 1.7%  | 1.6%  | 1.5%  | 1.5%  | 1.6%  | 1.6%  | 1.6%  |
| Southeast Asia       | 4.0%  | 4.1%  | 4.2%  | 4.3%  | 4.4%  | 4.5%  | 4.5%  |
| Rest of Asia Pacific | 4.7%  | 4.4%  | 4.2%  | 4.3%  | 4.4%  | 4.5%  | 4.5%  |

Table S24. The regional fraction of NG SMR and NG SMR CCS between 2020 and 2050 in the APS and NZE scenario.

|                                   | 2020  | 2025  | 2030  | 2035  | 2040  | 2045  | 2050  |
|-----------------------------------|-------|-------|-------|-------|-------|-------|-------|
| United States                     | 17.9% | 19.4% | 20.4% | 21.6% | 22.3% | 22.8% | 23.2% |
| Rest of North America             | 4.7%  | 4.3%  | 4.0%  | 3.5%  | 3.2%  | 3.0%  | 2.8%  |
| Brazil                            | 0.3%  | 0.6%  | 0.8%  | 1.1%  | 1.3%  | 1.4%  | 1.5%  |
| Rest of Central and South America | 4.2%  | 4.6%  | 4.9%  | 4.9%  | 5.0%  | 5.0%  | 5.0%  |
| European Union                    | 8.8%  | 9.2%  | 9.6%  | 9.3%  | 9.1%  | 9.0%  | 8.9%  |
| Rest of Europe                    | 2.4%  | 2.9%  | 3.2%  | 3.3%  | 3.3%  | 3.3%  | 3.4%  |
| Africa                            | 4.7%  | 4.8%  | 4.8%  | 5.1%  | 5.4%  | 5.5%  | 5.6%  |
| Middle East                       | 18.3% | 18.4% | 18.4% | 15.8% | 14.3% | 13.2% | 12.5% |
| Russia                            | 5.2%  | 3.9%  | 3.1%  | 2.4%  | 1.9%  | 1.7%  | 1.4%  |
| Rest of Eurasia                   | 0.4%  | 0.4%  | 0.3%  | 0.3%  | 0.2%  | 0.2%  | 0.2%  |
| China                             | 11.4% | 10.8% | 10.3% | 9.6%  | 9.1%  | 8.8%  | 8.6%  |
| India                             | 11.5% | 10.9% | 10.5% | 11.5% | 12.0% | 12.4% | 12.7% |
| Japan                             | 1.7%  | 1.8%  | 1.9%  | 2.2%  | 2.4%  | 2.5%  | 2.6%  |
| Southeast Asia                    | 4.0%  | 3.8%  | 3.6%  | 3.8%  | 4.0%  | 4.1%  | 4.1%  |
| Rest of Asia Pacific              | 4.7%  | 4.4%  | 4.3%  | 5.6%  | 6.4%  | 7.0%  | 7.3%  |



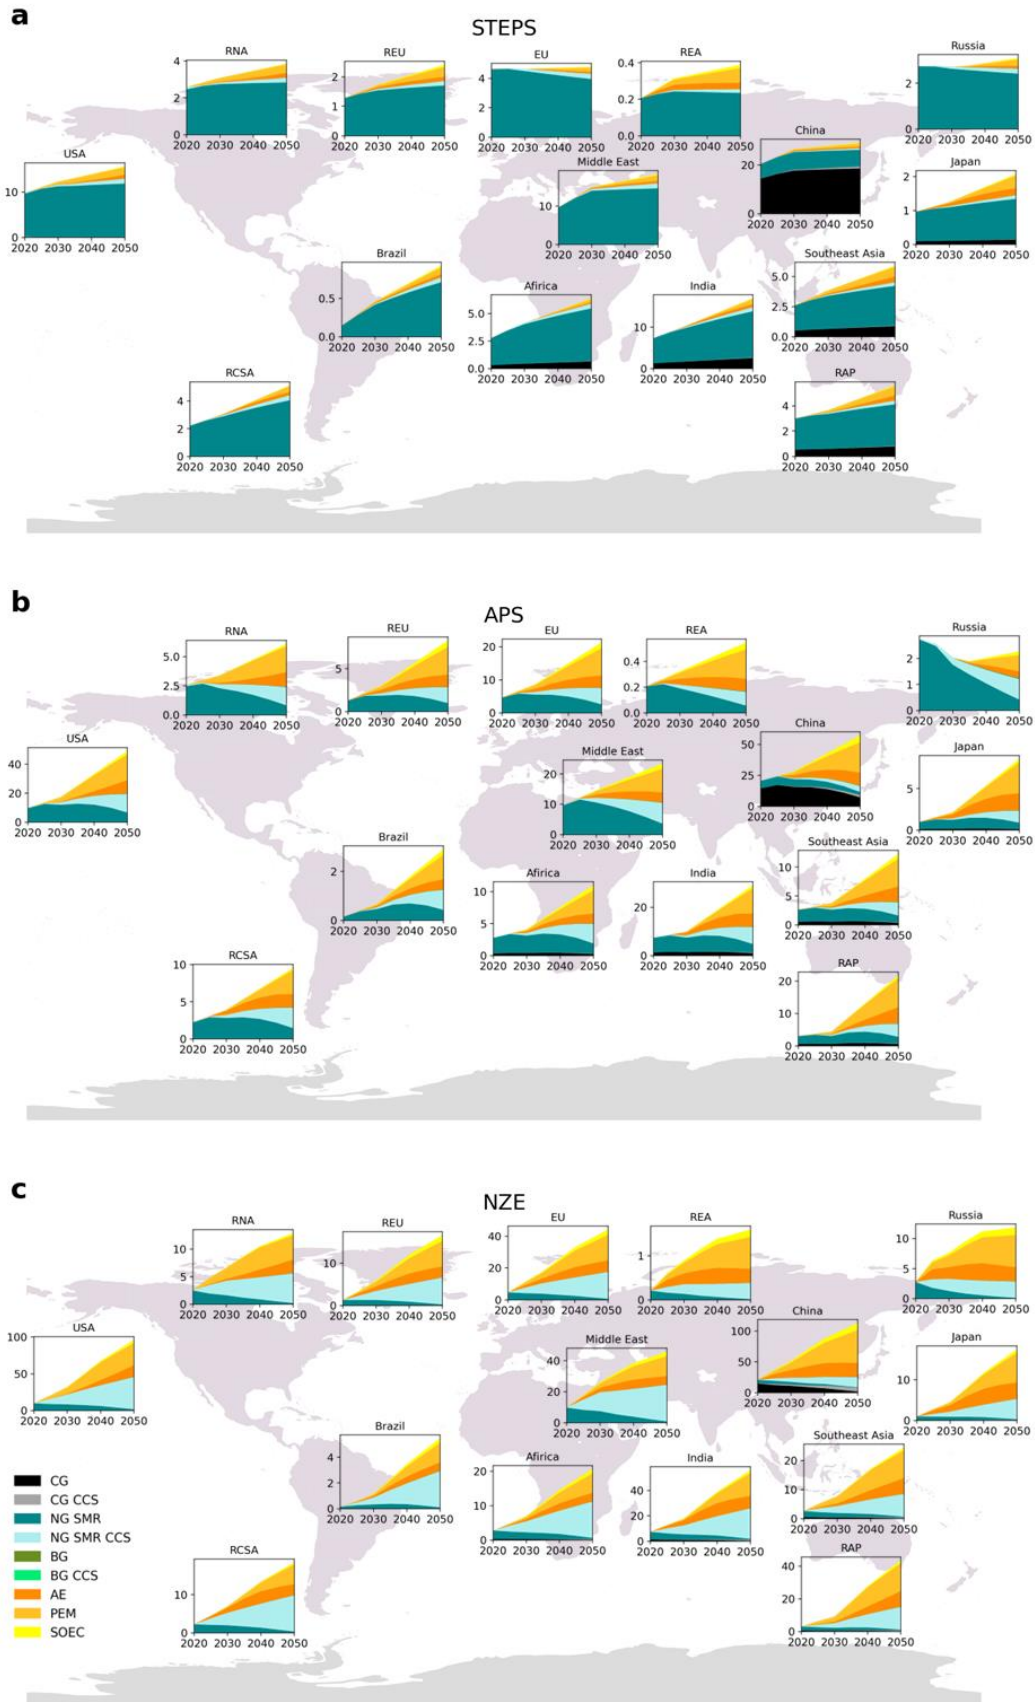

Figure S1.  $H_2$  production volumes in 15 regions from 2020 to 2050 in the STEPS, APS and NZE scenarios. In the figure, RNA= Rest of North America, REU= Rest of Europe, REA= Rest of Eurasia, RCSA= Rest of Central and South America and RAP= Rest of Asia Pacific. The unit of the stacked area charts is Mt per year.

### 3. Regional scope

Table S25. The region matching between IEA and REMIND models.

| No. | IEA regions                       | REMIND regions |
|-----|-----------------------------------|----------------|
| 1   | Brazil                            | LAM            |
| 2   | Rest of Central and South America | LAM            |
| 3   | Southeast Asia                    | OAS            |
| 4   | Rest of Asia Pacific              | OAS            |
| 5   | Africa                            | SSA            |
| 6   | European Union (EU)               | EUR            |
| 7   | Rest of Europe                    | NEU            |
| 8   | Middle East                       | MEA            |
| 9   | Russia                            | REF            |
| 10  | Rest of Eurasia                   | REF            |
| 11  | Rest of North America             | CAZ            |
| 12  | China                             | CHA            |
| 13  | India                             | IND            |
| 14  | Japan                             | JPN            |
| 15  | USA                               | USA            |

Table S26. IEA regions and countries (ISO alpha-3 code).

| No | IEA Regions                       | ISO code of countries belonging to this region                                                                                                                                                                                                                                                      |
|----|-----------------------------------|-----------------------------------------------------------------------------------------------------------------------------------------------------------------------------------------------------------------------------------------------------------------------------------------------------|
| 1  | Brazil                            | BRA                                                                                                                                                                                                                                                                                                 |
| 2  | Rest of Central and South America | ABW, AIA, ARG, ATG, BES, BHS, BLM, BLZ, BMU, BOL, BRB, BVT, CHL, COL, CRI, CUB, CUW, CYM, DMA, DOM, ECU, FLK, GLP, GRD, GTM, GUF, GUY, HND, HTI, JAM, KNA, LCA, MAF, MSR, MTQ, NIC, PAN, PER, PRI, PRY, SGS, SLV, SUR, SXM, TCA, TTO, URY, VCT, VEN, VGB and VIR                                    |
| 3  | Southeast Asia                    | BRN, IDN, KHM, LAO, MMR, MYS, PHL, SGP, THA and VNM                                                                                                                                                                                                                                                 |
| 4  | Rest of Asia Pacific              | AFG, ASM, ATF, AUS, BGD,BTN, CCK, COK, CXR, FJI, FSM, GUM, HMD, IOT, KIR, KOR, LKA, MDV, MHL, MNG, MNP, NCL, NFK, NIU, NPL, NRU, NZL, PAK, PCN, PLW, PNG, PRK, PYF, SLB, TKL, TLS, TON, TUV, TWN, UMI, VUT, WLF, WSM and MAC                                                                        |
| 5  | Africa                            | AGO, BDI, BEN, BFA, BWA, CAF, CIV, CMR, COD, COG, COM, CPV, DJI, DZA, EGY, ERI, ESH, ETH, GAB, GHA, GIN, GMB, GNB, GNQ, KEN, LBR, LBY, LSO, MAR, MDG, MLI, MOZ, MRT, MUS, MWI, MYT, NAM, NER, NGA, REU, RWA, SDN, SEN, SHN, SLE, SOM, SSD, STP, SWZ, SYC, TCD, TGO, TUN, TZA, UGA, ZAF, ZMB and ZWE |
| 6  | EU                                | AUT, BEL, BGR, CYP, CZE, DEU, DNK, ESP, EST, FIN, FRA, GRC, HRV, HUN, IRL, ITA, LTU, LUX, LVA, MLT, NLD, POL, PRT, ROU, SVK, SVN and SWE                                                                                                                                                            |
| 7  | Rest of Europe                    | ALA, ALB, AND, BIH, BLR, CHE, FRO, GBR, GGY, GIB, GRL, IMN, ISL, LIE, JEY, MCO, MDA, MKD, MNE, NOR, SJM, SMR, SRB, TUR, UKR, VAT, ISR and PSE,                                                                                                                                                      |
| 8  | Middle East                       | ARE, BHR, IRN, IRQ, JOR, KWT, LBN, OMN, QAT, SAU, SYR and YEM                                                                                                                                                                                                                                       |
| 9  | Russia                            | RUS                                                                                                                                                                                                                                                                                                 |
| 10 | Rest of Eurasia                   | ARM, AZE, GEO, KAZ, KGZ, TJK, TKM and UZB                                                                                                                                                                                                                                                           |
| 11 | Rest of North America             | CAN, SPM and MEX                                                                                                                                                                                                                                                                                    |
| 12 | China                             | CHN and HKG                                                                                                                                                                                                                                                                                         |
| 13 | India                             | IND                                                                                                                                                                                                                                                                                                 |
| 14 | Japan                             | JPN                                                                                                                                                                                                                                                                                                 |
| 15 | USA                               | USA                                                                                                                                                                                                                                                                                                 |

Source: IEA<sup>40</sup>

Table S27. REMIND regions and countries (ISO alpha-3 code).

| No. | REMIND regions | ISO code of countries belonging to this region                                                                                                                                                                                                                                   |
|-----|----------------|----------------------------------------------------------------------------------------------------------------------------------------------------------------------------------------------------------------------------------------------------------------------------------|
| 1   | LAM            | ABW, AIA, ARG, ATA, ATG, BES, BHS, BLM, BLZ, BMU, BOL, BRA, BRB, BVT, CHL, COL, CRI, CUB, CUW, CYM, DMA, DOM, ECU, FLK, GLP, GRD, GTM, GUF, GUY, HND, HTI, JAM, KNA, LCA, MAF, MEX, MSR, MTQ, NIC, PAN, PER, PRI, PRY, SGS, SLV, SUR, SXM, TCA, TTO, URY, VCT, VEN, VGB, and VIR |
| 2   | OAS            | AFG, ASM, ATF, BGD, BRN, BTN, CCK, COK, CXR, FJI, FSM, GUM, IDN, IOT, KHM, KIR, KOR, LAO, LKA, MDV, MHL, MMR, MNG, MNP, MYS, NCL, NFK, NIU, NPL, NRU, PAK, PCN, PHL, PLW, PNG, PRK, PYF, SGP, SLB, THA, TKL, TLS, TON, TUV, UMI, VNM, VUT, WLF, and WSM                          |
| 3   | SSA            | AGO, BDI, BEN, BFA, BWA, CAF, CIV, CMR, COD, COG, COM, CPV, DJI, ERI, ETH, GAB, GHA, GIN, GMB, GNB, GNQ, KEN, LBR, LSO, MDG, MLI, MOZ, MRT, MUS, MWI, MYT, NAM, NER, NGA, REU, RWA, SEN, SHN, SLE, SOM, SSD, STP, SWZ, SYC, TCD, TGO, TZA, UGA, ZAF, ZMB, and ZWE                |
| 4   | EUR            | ALA, AUT, BEL, BGR, CYP, CZE, DEU, DNK, ESP, EST, FIN, FRA, FRO, GBR, GGY, GIB, GRC, HRV, HUN, IMN, IRL, ITA, JEY, LTU, LUX, LVA, MLT, NLD, POL, PRT, ROU, SVK, SVN, and SWE                                                                                                     |
| 5   | NEU            | ALB, AND, BIH, CHE, GRL, ISL, LIE, MCO, MKD, MNE, NOR, SJM, SMR, SRB, TUR, and VAT                                                                                                                                                                                               |
| 6   | MEA            | ARE, BHR, DZA, EGY, ESH, IRN, IRQ, ISR, JOR, KWT, LBN, LBY, MAR, OMN, PSE, QAT, SAU, SDN, SYR, TUN, and YEM                                                                                                                                                                      |
| 7   | REF            | ARM, AZE, BLR, GEO, KAZ, KGZ, MDA, RUS, TJK, TKM, UKR, and UZB                                                                                                                                                                                                                   |
| 8   | CAZ            | AUS, CAN, HMD, NZL, and SPM                                                                                                                                                                                                                                                      |
| 9   | CHA            | CHN, HKG, MAC, and TWN                                                                                                                                                                                                                                                           |
| 10  | IND            | IND                                                                                                                                                                                                                                                                              |
| 11  | JPN            | JPN                                                                                                                                                                                                                                                                              |
| 12  | USA            | USA                                                                                                                                                                                                                                                                              |

Source: Baumstark et al.<sup>41</sup>

## 4. Supplementary results

### 4.1 Prospective environmental impacts of H<sub>2</sub> production

Table S28. The contribution of various drivers to GHG emissions reduction from 2020 to 2050 of per kg H<sub>2</sub> produced by grid-powered water electrolysis.

| Scenario | Region | Technology | Electricity decarbonization (%) | Efficiency improvement (%) | Material demand decrease (%) | Lifespan extension (%) |
|----------|--------|------------|---------------------------------|----------------------------|------------------------------|------------------------|
| STEPS    | China  | AE-Grid    | 99.57                           | 0.27                       | 0.08                         | 0.09                   |
|          |        | PEM-Grid   | 99.45                           | 0.48                       | 0.05                         | 0.02                   |
|          |        | SOEC-Grid  | 99.62                           | 0.13                       | 0.10                         | 0.14                   |
|          | USA    | AE-Grid    | 99.42                           | 0.27                       | 0.14                         | 0.16                   |
|          |        | PEM-Grid   | 99.36                           | 0.52                       | 0.09                         | 0.03                   |
|          |        | SOEC-Grid  | 99.45                           | 0.09                       | 0.19                         | 0.26                   |
|          | EU     | AE-Grid    | 98.69                           | 0.87                       | 0.21                         | 0.24                   |
|          |        | PEM-Grid   | 98.26                           | 1.56                       | 0.13                         | 0.05                   |
|          |        | SOEC-Grid  | 98.87                           | 0.46                       | 0.27                         | 0.40                   |
| APS      | China  | AE-Grid    | 99.60                           | 0.24                       | 0.07                         | 0.09                   |
|          |        | PEM-Grid   | 99.50                           | 0.44                       | 0.05                         | 0.02                   |
|          |        | SOEC-Grid  | 99.65                           | 0.12                       | 0.10                         | 0.14                   |
|          | USA    | AE-Grid    | 99.40                           | 0.30                       | 0.14                         | 0.16                   |
|          |        | PEM-Grid   | 99.32                           | 0.56                       | 0.09                         | 0.03                   |
|          |        | SOEC-Grid  | 99.44                           | 0.11                       | 0.19                         | 0.26                   |
|          | EU     | AE-Grid    | 98.73                           | 0.84                       | 0.20                         | 0.23                   |

|     |       |           |        |       |      |      |
|-----|-------|-----------|--------|-------|------|------|
| NZE | China | PEM-Grid  | 98.32  | 1.50  | 0.13 | 0.05 |
|     |       | SOEC-Grid | 98.91  | 0.44  | 0.27 | 0.39 |
|     |       | AE-Grid   | 99.62  | 0.21  | 0.08 | 0.09 |
|     | USA   | PEM-Grid  | 99.54  | 0.39  | 0.05 | 0.02 |
|     |       | SOEC-Grid | 99.66  | 0.10  | 0.10 | 0.14 |
|     |       | AE-Grid   | 99.92  | -0.23 | 0.14 | 0.16 |
|     | EU    | PEM-Grid  | 100.22 | -0.34 | 0.09 | 0.03 |
|     |       | SOEC-Grid | 99.81  | -0.23 | 0.19 | 0.24 |
|     |       | AE-Grid   | 99.22  | 0.35  | 0.20 | 0.23 |
|     |       | PEM-Grid  | 99.16  | 0.67  | 0.12 | 0.05 |
|     |       | SOEC-Grid | 99.26  | 0.11  | 0.26 | 0.36 |

Table S29. Environmental impacts of per kg H<sub>2</sub> in the global H<sub>2</sub> market in three scenarios.

| Environmental impact categories (unit)                                         | STEPS |       |       | APS   |       | NZE   |       |
|--------------------------------------------------------------------------------|-------|-------|-------|-------|-------|-------|-------|
|                                                                                | 2020  | 2030  | 2050  | 2030  | 2050  | 2030  | 2050  |
| Acidification (mol H <sup>+</sup> -eq ×10 <sup>-2</sup> )                      | 1.3   | 1.6   | 1.6   | 2.3   | 1.4   | 2.8   | 1.3   |
| Ecotoxicity: freshwater (CTUe)                                                 | 171.9 | 187.2 | 177.2 | 208.2 | 135.4 | 196.6 | 123.7 |
| Resource use: energy carriers (MJ, net calorific value)                        | 157.4 | 163.7 | 148.4 | 170.5 | 86.7  | 171.2 | 90.4  |
| Eutrophication: aquatic freshwater (kg PO <sub>4</sub> -eq ×10 <sup>-3</sup> ) | 1.0   | 1.3   | 1.2   | 2.0   | 0.8   | 1.9   | 0.7   |
| Eutrophication: aquatic marine (kg N-eq ×10 <sup>-3</sup> )                    | 1.7   | 2.3   | 2.2   | 3.5   | 1.9   | 4.1   | 1.9   |
| Eutrophication: terrestrial (mol N-eq ×10 <sup>-2</sup> )                      | 3.8   | 4.3   | 3.9   | 5.0   | 2.3   | 4.9   | 2.2   |
| Human toxicity: cancer effects (CTUh ×10 <sup>-9</sup> )                       | 1.5   | 1.8   | 2.2   | 2.9   | 4.7   | 4.1   | 4.6   |
| Human toxicity: non- cancer effects (CTUh ×10 <sup>-9</sup> )                  | 3.2   | 4.3   | 5.1   | 7.3   | 9.6   | 9.8   | 9.2   |
| Ionising radiation: human health (kBq U <sup>235</sup> -eq)                    | 0.4   | 0.5   | 0.6   | 1.2   | 1.6   | 2.2   | 1.8   |
| Land use (dimensionless)                                                       | 11.8  | 15.4  | 26.6  | 28.8  | 84.6  | 44.2  | 81.8  |
| Resource use: minerals and metals (kg Sb-eq ×10 <sup>-5</sup> )                | 2.2   | 2.8   | 4.6   | 5.7   | 14.4  | 9.7   | 13.8  |
| Ozone depletion (kg CFC-11-eq ×10 <sup>-7</sup> )                              | 6.9   | 6.7   | 6.1   | 6.9   | 4.2   | 7.1   | 4.5   |
| Particulate matter (disease incidence ×10 <sup>-7</sup> )                      | 3.7   | 4.0   | 3.5   | 4.0   | 1.8   | 3.1   | 1.5   |
| Photochemical ozone formation (kg NMVOC-eq ×10 <sup>-2</sup> )                 | 1.3   | 1.5   | 1.3   | 1.7   | 0.9   | 1.9   | 0.9   |
| Water use (m <sup>3</sup> world eq. deprived)                                  | 0.2   | 0.6   | 1.0   | 1.9   | 2.9   | 3.2   | 3.2   |
| Climate change (kg CO <sub>2</sub> -eq)                                        | 13.6  | 13.8  | 12.0  | 12.9  | 3.7   | 9.4   | 2.3   |

Table S30. Environmental impacts of per kg H<sub>2</sub> in the H<sub>2</sub> market of China in three scenarios.

| Environmental impact categories (unit)                                         | STEPS |       |       | APS   |       | NZE   |       |
|--------------------------------------------------------------------------------|-------|-------|-------|-------|-------|-------|-------|
|                                                                                | 2020  | 2030  | 2050  | 2030  | 2050  | 2030  | 2050  |
| Acidification (mol H <sup>+</sup> -eq ×10 <sup>-2</sup> )                      | 2.5   | 2.9   | 1.9   | 3.2   | 1.9   | 3.7   | 1.7   |
| Ecotoxicity: freshwater (CTUe)                                                 | 394.5 | 427.7 | 212.9 | 437.9 | 212.9 | 370.0 | 175.2 |
| Resource use: energy carriers (MJ, net calorific value)                        | 156.0 | 168.1 | 101.8 | 173.6 | 101.8 | 166.9 | 91.6  |
| Eutrophication: aquatic freshwater (kg PO <sub>4</sub> -eq ×10 <sup>-3</sup> ) | 2.4   | 2.7   | 1.3   | 2.8   | 1.3   | 2.9   | 1.1   |
| Eutrophication: aquatic marine (kg N-eq ×10 <sup>-3</sup> )                    | 2.4   | 3.3   | 2.4   | 4.2   | 2.4   | 5.4   | 2.1   |
| Eutrophication: terrestrial (mol N-eq ×10 <sup>-2</sup> )                      | 8.3   | 9.0   | 3.6   | 9.0   | 3.6   | 7.6   | 2.7   |
| Human toxicity: cancer effects (CTUh ×10 <sup>-9</sup> )                       | 1.5   | 1.9   | 5.5   | 3.1   | 5.5   | 5.6   | 5.8   |
| Human toxicity: non- cancer effects (CTUh ×10 <sup>-7</sup> )                  | 0.4   | 0.6   | 1.2   | 1.0   | 1.2   | 1.5   | 1.3   |

|                                                                 |       |      |       |      |       |      |       |
|-----------------------------------------------------------------|-------|------|-------|------|-------|------|-------|
| Ionising radiation: human health (kBq U <sup>235</sup> -eq)     | -0.07 | 0.03 | 2.7   | 0.6  | 2.7   | 1.7  | 2.9   |
| Land use (dimensionless)                                        | 27.6  | 30.9 | 121.5 | 48.1 | 121.5 | 86.0 | 125.2 |
| Resource use: minerals and metals (kg Sb-eq ×10 <sup>-4</sup> ) | 0.2   | 0.2  | 1.8   | 0.6  | 1.8   | 1.4  | 1.9   |
| Ozone depletion (kg CFC-11-eq ×10 <sup>-7</sup> )               | 2.5   | 2.6  | 2.5   | 2.8  | 2.5   | 3.8  | 2.6   |
| Particulate matter (disease incidence ×10 <sup>-6</sup> )       | 1.1   | 1.2  | 0.4   | 1.2  | 0.4   | 0.8  | 0.3   |
| Photochemical ozone formation (kg NMVOC-eq ×10 <sup>-2</sup> )  | 0.7   | 1.0  | 0.7   | 1.2  | 0.7   | 1.6  | 0.7   |
| Water use (m <sup>3</sup> world eq. deprived)                   | 0.6   | 0.8  | 1.4   | 1.1  | 1.4   | 1.6  | 1.5   |
| Climate change (kg CO <sub>2</sub> -eq)                         | 19.1  | 20.0 | 5.2   | 19.1 | 5.2   | 13.5 | 2.4   |

Table S31. Environmental impacts of per kg H<sub>2</sub> in the H<sub>2</sub> market of USA in three scenarios.

| Environmental impact categories (unit)                                         | STEPS |       |       | APS   |       | NZE   |       |
|--------------------------------------------------------------------------------|-------|-------|-------|-------|-------|-------|-------|
|                                                                                | 2020  | 2030  | 2050  | 2030  | 2050  | 2030  | 2050  |
| Acidification (mol H <sup>+</sup> -eq ×10 <sup>-2</sup> )                      | 1.3   | 1.4   | 1.3   | 1.9   | 1.3   | 1.6   | 1.4   |
| Ecotoxicity: freshwater (CTUe)                                                 | 114.4 | 114.3 | 117.8 | 139.8 | 117.8 | 133.7 | 119.8 |
| Resource use: energy carriers (MJ, net calorific value)                        | 147.1 | 150.4 | 69.6  | 162.8 | 69.6  | 156.3 | 84.3  |
| Eutrophication: aquatic freshwater (kg PO <sub>4</sub> -eq ×10 <sup>-3</sup> ) | -0.1  | 0.2   | 0.5   | 1.9   | 0.5   | 0.4   | 0.5   |
| Eutrophication: aquatic marine (kg N-eq ×10 <sup>-3</sup> )                    | 1.8   | 2.0   | 1.6   | 3.0   | 1.6   | 2.4   | 1.7   |
| Eutrophication: terrestrial (mol N-eq ×10 <sup>-2</sup> )                      | 2.1   | 2.1   | 1.7   | 2.9   | 1.7   | 2.6   | 1.9   |
| Human toxicity: cancer effects (CTUh ×10 <sup>-9</sup> )                       | 2.4   | 2.7   | 4.5   | 3.5   | 4.5   | 3.8   | 4.3   |
| Human toxicity: non- cancer effects (CTUh ×10 <sup>-8</sup> )                  | 2.4   | 3.1   | 8.0   | 5.6   | 8.0   | 5.7   | 7.2   |
| Ionising radiation: human health (kBq U <sup>235</sup> -eq)                    | 0.8   | 1.2   | 0.7   | 1.9   | 0.7   | 2.6   | 1.0   |
| Land use (dimensionless)                                                       | 3.3   | 7.5   | 75.5  | 20.5  | 75.5  | 29.3  | 69.3  |
| Resource use: minerals and metals (kg Sb-eq ×10 <sup>-4</sup> )                | 0.3   | 0.3   | 1.2   | 0.6   | 1.2   | 0.8   | 1.1   |
| Ozone depletion (kg CFC-11-eq ×10 <sup>-7</sup> )                              | 5.8   | 5.8   | 3.4   | 5.6   | 3.4   | 5.4   | 3.8   |
| Particulate matter (disease incidence ×10 <sup>-7</sup> )                      | 0.9   | 1.0   | 1.1   | 1.3   | 1.1   | 1.2   | 1.1   |
| Photochemical ozone formation (kg NMVOC-eq ×10 <sup>-2</sup> )                 | 1.8   | 1.9   | 1.0   | 2.0   | 1.0   | 1.8   | 1.2   |
| Water use (m <sup>3</sup> world eq. deprived)                                  | 0.2   | 0.3   | 0.8   | 0.8   | 0.8   | 1.1   | 1.0   |
| Climate change (kg CO <sub>2</sub> -eq)                                        | 10.4  | 10.4  | 3.4   | 10.1  | 3.4   | 6.6   | 2.4   |

Table S32. Environmental impacts of per kg H<sub>2</sub> in the H<sub>2</sub> market of EU in three scenarios.

| Environmental impact categories (unit)                                         | STEPS |       |       | APS   |       | NZE   |       |
|--------------------------------------------------------------------------------|-------|-------|-------|-------|-------|-------|-------|
|                                                                                | 2020  | 2030  | 2050  | 2030  | 2050  | 2030  | 2050  |
| Acidification (mol H <sup>+</sup> -eq ×10 <sup>-2</sup> )                      | 0.7   | 0.6   | 1.2   | 1.1   | 1.2   | 1.3   | 1.2   |
| Ecotoxicity: freshwater (CTUe)                                                 | 59.0  | 57.0  | 106.8 | 93.4  | 106.8 | 110.4 | 106.0 |
| Resource use: energy carriers (MJ, net calorific value)                        | 170.7 | 168.6 | 75.1  | 169.9 | 75.1  | 161.3 | 81.4  |
| Eutrophication: aquatic freshwater (kg PO <sub>4</sub> -eq ×10 <sup>-4</sup> ) | 3.3   | 1.7   | 5.8   | 3.6   | 5.8   | 4.6   | 5.4   |
| Eutrophication: aquatic marine (kg N-eq ×10 <sup>-3</sup> )                    | 2.0   | 1.9   | 2.1   | 2.8   | 2.1   | 3.1   | 2.2   |
| Eutrophication: terrestrial (mol N-eq ×10 <sup>-2</sup> )                      | 2.2   | 2.1   | 2.3   | 3.1   | 2.3   | 3.4   | 2.5   |
| Human toxicity: cancer effects (CTUh ×10 <sup>-9</sup> )                       | 1.7   | 1.7   | 5.1   | 3.3   | 5.1   | 4.1   | 4.9   |
| Human toxicity: non- cancer effects (CTUh ×10 <sup>-8</sup> )                  | 2.5   | 2.3   | 9.2   | 5.6   | 9.2   | 7.4   | 8.7   |
| Ionising radiation: human health (kBq U <sup>235</sup> -eq)                    | 1.1   | 1.1   | 0.8   | 2.7   | 0.8   | 3.5   | 0.9   |
| Land use (dimensionless)                                                       | 3.4   | 3.9   | 50.4  | 22.8  | 50.4  | 34.4  | 54.0  |
| Resource use: minerals and metals (kg Sb-eq ×10 <sup>-4</sup> )                | 0.3   | 0.3   | 1.4   | 0.7   | 1.4   | 1.0   | 1.3   |

|                                                               |      |      |     |     |     |     |     |
|---------------------------------------------------------------|------|------|-----|-----|-----|-----|-----|
| Ozone depletion (kg CFC-11-eq $\times 10^{-6}$ )              | 1.9  | 1.9  | 0.8 | 1.6 | 0.8 | 1.3 | 0.9 |
| Particulate matter (disease incidence $\times 10^{-7}$ )      | 0.5  | 0.5  | 1.1 | 1.0 | 1.1 | 1.2 | 1.1 |
| Photochemical ozone formation (kg NMVOC-eq $\times 10^{-2}$ ) | 1.6  | 1.6  | 1.0 | 1.6 | 1.0 | 1.5 | 1.1 |
| Water use (m <sup>3</sup> world eq. deprived)                 | 0.3  | 0.3  | 1.4 | 1.4 | 1.4 | 1.9 | 1.6 |
| Climate change (kg CO <sub>2</sub> -eq)                       | 11.4 | 11.2 | 3.6 | 8.8 | 3.6 | 5.5 | 2.7 |

Table S33. Environmental impacts of per kg H<sub>2</sub> in the H<sub>2</sub> market of Brazil in three scenarios.

| Environmental impact categories (unit)                                        | STEPS |       |      | APS   |      | NZE   |      |
|-------------------------------------------------------------------------------|-------|-------|------|-------|------|-------|------|
|                                                                               | 2020  | 2030  | 2050 | 2030  | 2050 | 2030  | 2050 |
| Acidification (mol H <sup>+</sup> -eq $\times 10^{-2}$ )                      | 0.4   | 0.6   | 1.0  | 0.9   | 1.0  | 1.0   | 1.0  |
| Ecotoxicity: freshwater (CTUe)                                                | 35.8  | 45.0  | 88.9 | 61.1  | 88.9 | 66.9  | 79.4 |
| Resource use: energy carriers (MJ, net calorific value)                       | 161.9 | 155.6 | 78.9 | 138.0 | 78.9 | 129.8 | 92.8 |
| Eutrophication: aquatic freshwater (kg PO <sub>4</sub> -eq $\times 10^{-4}$ ) | 0.1   | 1.6   | 4.9  | 2.5   | 4.9  | 3.5   | 4.1  |
| Eutrophication: aquatic marine (kg N-eq $\times 10^{-3}$ )                    | 1.3   | 1.5   | 1.6  | 1.8   | 1.6  | 1.9   | 1.6  |
| Eutrophication: terrestrial (mol N-eq $\times 10^{-2}$ )                      | 1.4   | 1.7   | 1.7  | 2.0   | 1.7  | 2.1   | 1.9  |
| Human toxicity: cancer effects (CTUh $\times 10^{-9}$ )                       | 0.9   | 1.3   | 3.8  | 2.1   | 3.8  | 2.4   | 3.3  |
| Human toxicity: non- cancer effects (CTUh $\times 10^{-8}$ )                  | 1.8   | 2.6   | 7.7  | 4.1   | 7.7  | 4.6   | 6.5  |
| Ionising radiation: human health (kBq U <sup>235</sup> -eq)                   | 0.03  | 0.1   | 0.2  | 0.2   | 0.2  | 0.3   | 0.2  |
| Land use (dimensionless)                                                      | 4.3   | 11.6  | 87.3 | 28.7  | 87.3 | 29.8  | 76.3 |
| Resource use: minerals and metals (kg Sb-eq $\times 10^{-4}$ )                | 0.2   | 0.3   | 1.2  | 0.6   | 1.2  | 0.7   | 1.0  |
| Ozone depletion (kg CFC-11-eq $\times 10^{-6}$ )                              | 2.0   | 1.9   | 1.0  | 1.6   | 1.0  | 1.5   | 1.1  |
| Particulate matter (disease incidence $\times 10^{-8}$ )                      | 1.6   | 3.6   | 9.5  | 6.3   | 9.5  | 7.2   | 8.9  |
| Photochemical ozone formation (kg NMVOC-eq $\times 10^{-3}$ )                 | 6.3   | 7.0   | 6.2  | 7.5   | 6.2  | 7.6   | 6.5  |
| Water use (m <sup>3</sup> world eq. deprived)                                 | -0.8  | 1.6   | 7.1  | 6.1   | 7.1  | 8.2   | 8.5  |
| Climate change (kg CO <sub>2</sub> -eq)                                       | 10.1  | 9.5   | 3.6  | 7.9   | 3.6  | 5.3   | 2.5  |

Table S34. Environmental impacts of per kg H<sub>2</sub> in the H<sub>2</sub> market of Rest of Central and South America in three scenarios.

| Environmental impact categories (unit)                                        | STEPS |       |      | APS   |      | NZE   |      |
|-------------------------------------------------------------------------------|-------|-------|------|-------|------|-------|------|
|                                                                               | 2020  | 2030  | 2050 | 2030  | 2050 | 2030  | 2050 |
| Acidification (mol H <sup>+</sup> -eq $\times 10^{-3}$ )                      | 4.1   | 5.5   | 9.7  | 8.1   | 9.7  | 9.4   | 9.2  |
| Ecotoxicity: freshwater (CTUe)                                                | 36.2  | 40.1  | 85.6 | 57.1  | 85.6 | 65.4  | 77.4 |
| Resource use: energy carriers (MJ, net calorific value)                       | 161.9 | 160.6 | 79.6 | 141.7 | 79.6 | 130.8 | 92.2 |
| Eutrophication: aquatic freshwater (kg PO <sub>4</sub> -eq $\times 10^{-4}$ ) | 0.2   | 1.2   | 4.7  | 2.3   | 4.7  | 3.3   | 3.9  |
| Eutrophication: aquatic marine (kg N-eq $\times 10^{-3}$ )                    | 1.3   | 1.5   | 1.5  | 1.7   | 1.5  | 1.8   | 1.5  |
| Eutrophication: terrestrial (mol N-eq $\times 10^{-2}$ )                      | 1.4   | 1.6   | 1.6  | 1.9   | 1.6  | 2.0   | 1.8  |
| Human toxicity: cancer effects (CTUh $\times 10^{-9}$ )                       | 0.9   | 1.0   | 3.8  | 2.0   | 3.8  | 2.4   | 3.3  |
| Human toxicity: non- cancer effects (CTUh $\times 10^{-8}$ )                  | 1.9   | 2.2   | 7.5  | 3.8   | 7.5  | 4.5   | 6.5  |
| Ionising radiation: human health (kBq U <sup>235</sup> -eq)                   | 0.03  | 0.06  | 0.2  | 0.2   | 0.2  | 0.3   | 0.2  |
| Land use (dimensionless)                                                      | 4.3   | 6.3   | 86.5 | 25.1  | 86.5 | 28.9  | 76.4 |
| Resource use: minerals and metals (kg Sb-eq $\times 10^{-4}$ )                | 0.2   | 0.3   | 1.2  | 0.5   | 1.2  | 0.7   | 1.0  |
| Ozone depletion (kg CFC-11-eq $\times 10^{-6}$ )                              | 2.0   | 1.9   | 1.0  | 1.7   | 1.0  | 1.6   | 1.1  |
| Particulate matter (disease incidence $\times 10^{-8}$ )                      | 1.7   | 2.7   | 8.0  | 5.3   | 8.0  | 6.4   | 7.8  |
| Photochemical ozone formation (kg NMVOC-eq $\times 10^{-3}$ )                 | 6.4   | 6.8   | 6.0  | 7.3   | 6.0  | 7.5   | 6.3  |

|                                               |      |     |     |     |     |     |     |
|-----------------------------------------------|------|-----|-----|-----|-----|-----|-----|
| Water use (m <sup>3</sup> world eq. deprived) | -0.7 | 0.3 | 7.0 | 5.2 | 7.0 | 8.0 | 8.6 |
| Climate change (kg CO <sub>2</sub> -eq)       | 10.1 | 9.8 | 3.5 | 8.1 | 3.5 | 5.3 | 2.4 |

Table S35. Environmental impacts of per kg H<sub>2</sub> in the H<sub>2</sub> market of Rest of North America in three scenarios.

| Environmental impact categories (unit)                                         | STEPS |       |      | APS   |      | NZE   |      |
|--------------------------------------------------------------------------------|-------|-------|------|-------|------|-------|------|
|                                                                                | 2020  | 2030  | 2050 | 2030  | 2050 | 2030  | 2050 |
| Acidification (mol H <sup>+</sup> -eq ×10 <sup>-2</sup> )                      | 1.8   | 1.8   | 1.2  | 1.7   | 1.2  | 1.6   | 1.3  |
| Ecotoxicity: freshwater (CTUe)                                                 | 31.2  | 38.5  | 61.0 | 50.4  | 61.0 | 62.6  | 60.7 |
| Resource use: energy carriers (MJ, net calorific value)                        | 139.2 | 136.5 | 67.2 | 130.1 | 67.2 | 119.6 | 76.9 |
| Eutrophication: aquatic freshwater (kg PO <sub>4</sub> -eq ×10 <sup>-4</sup> ) | -3.7  | 1.5   | 2.6  | 1.6   | 2.6  | 3.2   | 2.2  |
| Eutrophication: aquatic marine (kg N-eq ×10 <sup>-3</sup> )                    | 2.3   | 2.5   | 1.7  | 2.4   | 1.7  | 2.3   | 1.7  |
| Eutrophication: terrestrial (mol N-eq ×10 <sup>-2</sup> )                      | 2.6   | 2.7   | 1.8  | 2.6   | 1.8  | 2.4   | 1.9  |
| Human toxicity: cancer effects (CTUh ×10 <sup>-9</sup> )                       | 1.9   | 2.0   | 3.0  | 2.3   | 3.0  | 2.5   | 2.7  |
| Human toxicity: non- cancer effects (CTUh ×10 <sup>-8</sup> )                  | 1.7   | 2.2   | 4.0  | 2.7   | 4.0  | 3.1   | 3.5  |
| Ionising radiation: human health (kBq U <sup>235</sup> -eq)                    | -0.1  | 0.4   | 0.6  | 1.1   | 0.6  | 2.1   | 1.0  |
| Land use (dimensionless)                                                       | 6.5   | 9.2   | 36.2 | 8.1   | 36.2 | 5.6   | 32.7 |
| Resource use: minerals and metals (kg Sb-eq ×10 <sup>-5</sup> )                | 2.2   | 2.6   | 5.5  | 3.2   | 5.5  | 3.8   | 4.6  |
| Ozone depletion (kg CFC-11-eq ×10 <sup>-6</sup> )                              | 1.4   | 1.3   | 0.7  | 1.1   | 0.7  | 1.0   | 0.7  |
| Particulate matter (disease incidence ×10 <sup>-7</sup> )                      | 1.0   | 1.0   | 0.9  | 1.0   | 0.9  | 1.0   | 0.9  |
| Photochemical ozone formation (kg NMVOC-eq ×10 <sup>-2</sup> )                 | 1.0   | 1.0   | 0.7  | 1.0   | 0.7  | 0.9   | 0.7  |
| Water use (m <sup>3</sup> world eq. deprived)                                  | -0.5  | 2.1   | 10.5 | 6.5   | 10.5 | 12.0  | 14.9 |
| Climate change (kg CO <sub>2</sub> -eq)                                        | 9.3   | 8.9   | 2.9  | 7.5   | 2.9  | 4.3   | 2.1  |

Table S36. Environmental impacts of per kg H<sub>2</sub> in the H<sub>2</sub> market of Rest of Europe in three scenarios.

| Environmental impact categories (unit)                                         | STEPS |       |      | APS   |      | NZE   |      |
|--------------------------------------------------------------------------------|-------|-------|------|-------|------|-------|------|
|                                                                                | 2020  | 2030  | 2050 | 2030  | 2050 | 2030  | 2050 |
| Acidification (mol H <sup>+</sup> -eq ×10 <sup>-2</sup> )                      | 0.6   | 1.2   | 0.9  | 0.7   | 0.9  | 4.3   | 0.9  |
| Ecotoxicity: freshwater (CTUe)                                                 | 26.8  | 35.9  | 92.9 | 64.7  | 92.9 | 81.2  | 84.2 |
| Resource use: energy carriers (MJ, net calorific value)                        | 161.0 | 152.9 | 60.3 | 122.0 | 60.3 | 134.5 | 69.6 |
| Eutrophication: aquatic freshwater (kg PO <sub>4</sub> -eq ×10 <sup>-3</sup> ) | 0.3   | 1.0   | 0.5  | 0.3   | 0.5  | 4.6   | 0.5  |
| Eutrophication: aquatic marine (kg N-eq ×10 <sup>-3</sup> )                    | 1.2   | 1.5   | 1.2  | 1.3   | 1.2  | 3.0   | 1.2  |
| Eutrophication: terrestrial (mol N-eq ×10 <sup>-2</sup> )                      | 1.3   | 1.4   | 1.3  | 1.4   | 1.3  | 2.3   | 1.3  |
| Human toxicity: cancer effects (CTUh ×10 <sup>-9</sup> )                       | 1.0   | 1.5   | 3.8  | 2.4   | 3.8  | 3.4   | 3.6  |
| Human toxicity: non- cancer effects (CTUh ×10 <sup>-8</sup> )                  | 1.8   | 3.0   | 8.5  | 4.7   | 8.5  | 8.1   | 7.8  |
| Ionising radiation: human health (kBq U <sup>235</sup> -eq)                    | 0.9   | 0.9   | 0.4  | 0.9   | 0.4  | 1.2   | 0.5  |
| Land use (dimensionless)                                                       | 1.9   | 2.6   | 8.3  | 3.6   | 8.3  | 3.8   | 9.0  |
| Resource use: minerals and metals (kg Sb-eq ×10 <sup>-4</sup> )                | 0.2   | 0.4   | 1.4  | 0.7   | 1.4  | 0.9   | 1.3  |
| Ozone depletion (kg CFC-11-eq ×10 <sup>-6</sup> )                              | 1.2   | 1.1   | 0.5  | 1.0   | 0.5  | 0.9   | 0.6  |
| Particulate matter (disease incidence ×10 <sup>-8</sup> )                      | 2.5   | 3.6   | 6.1  | 4.5   | 6.1  | 9.0   | 5.8  |
| Photochemical ozone formation (kg NMVOC-eq ×10 <sup>-3</sup> )                 | 4.0   | 4.7   | 4.2  | 4.3   | 4.2  | 8.9   | 4.2  |
| Water use (m <sup>3</sup> world eq. deprived)                                  | 0.3   | 3.0   | 11.6 | 10.5  | 11.6 | 13.3  | 11.4 |
| Climate change (kg CO <sub>2</sub> -eq)                                        | 9.8   | 9.2   | 2.6  | 6.8   | 2.6  | 6.0   | 2.0  |

Table S37. Environmental impacts of per kg H<sub>2</sub> in the H<sub>2</sub> market of Africa in three scenarios.

| Environmental impact categories (unit)                                         | STEPS |       |       | APS   |       | NZE   |       |
|--------------------------------------------------------------------------------|-------|-------|-------|-------|-------|-------|-------|
|                                                                                | 2020  | 2030  | 2050  | 2030  | 2050  | 2030  | 2050  |
| Acidification (mol H <sup>+</sup> -eq ×10 <sup>-2</sup> )                      | 1.1   | 1.0   | 1.3   | 2.8   | 1.3   | 1.4   | 1.2   |
| Ecotoxicity: freshwater (CTUe)                                                 | 116.9 | 115.6 | 120.7 | 172.6 | 120.7 | 122.6 | 109.8 |
| Resource use: energy carriers (MJ, net calorific value)                        | 152.6 | 151.6 | 73.9  | 159.1 | 73.9  | 135.5 | 85.3  |
| Eutrophication: aquatic freshwater (kg PO <sub>4</sub> -eq ×10 <sup>-3</sup> ) | 1.3   | 1.3   | 0.9   | 2.4   | 0.9   | 0.9   | 0.6   |
| Eutrophication: aquatic marine (kg N-eq ×10 <sup>-3</sup> )                    | 1.6   | 1.6   | 1.6   | 3.0   | 1.6   | 1.9   | 1.5   |
| Eutrophication: terrestrial (mol N-eq ×10 <sup>-2</sup> )                      | 2.5   | 2.4   | 1.9   | 3.7   | 1.9   | 2.3   | 1.8   |
| Human toxicity: cancer effects (CTUh ×10 <sup>-9</sup> )                       | 1.0   | 1.0   | 4.7   | 2.4   | 4.7   | 2.4   | 4.0   |
| Human toxicity: non- cancer effects (CTUh ×10 <sup>-8</sup> )                  | 3.3   | 3.3   | 9.2   | 8.4   | 9.2   | 6.0   | 8.1   |
| Ionising radiation: human health (kBq U <sup>235</sup> -eq)                    | 0.09  | 0.08  | 0.08  | 0.2   | 0.09  | 0.2   | 0.1   |
| Land use (dimensionless)                                                       | 7.7   | 8.5   | 92.8  | 21.2  | 92.8  | 24.8  | 77.1  |
| Resource use: minerals and metals (kg Sb-eq ×10 <sup>-4</sup> )                | 0.2   | 0.2   | 1.3   | 0.5   | 1.3   | 0.7   | 1.1   |
| Ozone depletion (kg CFC-11-eq ×10 <sup>-7</sup> )                              | 6.7   | 6.7   | 4.2   | 6.5   | 4.2   | 6.7   | 4.7   |
| Particulate matter (disease incidence ×10 <sup>-7</sup> )                      | 0.6   | 0.5   | 1.2   | 1.0   | 1.2   | 0.9   | 1.0   |
| Photochemical ozone formation (kg NMVOC-eq ×10 <sup>-2</sup> )                 | 0.7   | 0.7   | 0.7   | 1.1   | 0.7   | 0.9   | 0.7   |
| Water use (m <sup>3</sup> world eq. deprived)                                  | 0.1   | 0.1   | 3.3   | 3.3   | 3.3   | 5.3   | 3.8   |
| Climate change (kg CO <sub>2</sub> -eq)                                        | 11.4  | 11.1  | 3.9   | 11.2  | 3.9   | 7.0   | 2.8   |

Table S38. Environmental impacts of per kg H<sub>2</sub> in the H<sub>2</sub> market of India in three scenarios.

| Environmental impact categories (unit)                                         | STEPS |       |       | APS   |       | NZE   |       |
|--------------------------------------------------------------------------------|-------|-------|-------|-------|-------|-------|-------|
|                                                                                | 2020  | 2030  | 2050  | 2030  | 2050  | 2030  | 2050  |
| Acidification (mol H <sup>+</sup> -eq ×10 <sup>-2</sup> )                      | -0.2  | 1.4   | 1.5   | 4.9   | 1.5   | 6.1   | 1.3   |
| Ecotoxicity: freshwater (CTUe)                                                 | 103.9 | 150.3 | 143.7 | 249.4 | 143.7 | 268.1 | 129.2 |
| Resource use: energy carriers (MJ, net calorific value)                        | 135.9 | 152.4 | 130.0 | 187.3 | 130.0 | 201.8 | 130.1 |
| Eutrophication: aquatic freshwater (kg PO <sub>4</sub> -eq ×10 <sup>-3</sup> ) | 0.6   | 1.5   | 1.0   | 3.3   | 1.0   | 3.6   | 0.7   |
| Eutrophication: aquatic marine (kg N-eq ×10 <sup>-3</sup> )                    | -0.2  | 1.9   | 2.1   | 6.3   | 2.1   | 7.8   | 1.8   |
| Eutrophication: terrestrial (mol N-eq ×10 <sup>-2</sup> )                      | 1.2   | 3.3   | 2.2   | 7.7   | 2.2   | 8.7   | 1.9   |
| Human toxicity: cancer effects (CTUh ×10 <sup>-9</sup> )                       | 0.8   | 1.3   | 4.4   | 2.9   | 4.4   | 4.0   | 4.1   |
| Human toxicity: non- cancer effects (CTUh ×10 <sup>-7</sup> )                  | 0.2   | 0.5   | 1.1   | 1.1   | 1.1   | 1.4   | 1.0   |
| Ionising radiation: human health (kBq U <sup>235</sup> -eq)                    | -0.03 | 0.08  | 5.3   | 1.3   | 5.3   | 3.1   | 5.0   |
| Land use (dimensionless)                                                       | 6.7   | 10.3  | 21.4  | 17.8  | 21.4  | 18.2  | 19.5  |
| Resource use: minerals and metals (kg Sb-eq ×10 <sup>-4</sup> )                | 0.2   | 0.3   | 1.6   | 0.6   | 1.6   | 0.9   | 1.4   |
| Ozone depletion (kg CFC-11-eq ×10 <sup>-7</sup> )                              | 6.2   | 6.2   | 4.3   | 6.1   | 4.3   | 6.3   | 4.5   |
| Particulate matter (disease incidence ×10 <sup>-7</sup> )                      | 0.4   | 0.7   | 1.3   | 1.4   | 1.3   | 1.7   | 1.1   |
| Photochemical ozone formation (kg NMVOC-eq ×10 <sup>-2</sup> )                 | 0.2   | 0.8   | 0.7   | 2.0   | 0.7   | 2.5   | 0.7   |
| Water use (m <sup>3</sup> world eq. deprived)                                  | -0.2  | 0.1   | 6.7   | 2.2   | 6.7   | 5.0   | 6.7   |
| Climate change (kg CO <sub>2</sub> -eq)                                        | 10.8  | 11.8  | 3.8   | 12.9  | 3.8   | 10.0  | 2.6   |

Table S39. Environmental impacts of per kg H<sub>2</sub> in the H<sub>2</sub> market of Japan in three scenarios.

| Environmental impact categories (unit) | STEPS |      |      | APS  |      | NZE  |      |
|----------------------------------------|-------|------|------|------|------|------|------|
|                                        | 2020  | 2030 | 2050 | 2030 | 2050 | 2030 | 2050 |



|                                                                                |       |       |       |       |       |       |       |
|--------------------------------------------------------------------------------|-------|-------|-------|-------|-------|-------|-------|
| Acidification (mol H <sup>+</sup> -eq ×10 <sup>-2</sup> )                      | 2.4   | 2.7   | 1.9   | 3.9   | 1.9   | 3.2   | 1.8   |
| Ecotoxicity: freshwater (CTUe)                                                 | 137.9 | 150.1 | 132.3 | 191.9 | 132.3 | 178.5 | 131.9 |
| Resource use: energy carriers (MJ, net calorific value)                        | 177.1 | 184.2 | 90.4  | 210.6 | 90.4  | 211.8 | 91.4  |
| Eutrophication: aquatic freshwater (kg PO <sub>4</sub> -eq ×10 <sup>-3</sup> ) | 1.1   | 1.3   | 0.8   | 2.4   | 0.8   | 1.3   | 0.6   |
| Eutrophication: aquatic marine (kg N-eq ×10 <sup>-3</sup> )                    | 3.8   | 4.5   | 3.2   | 6.6   | 3.2   | 5.6   | 3.0   |
| Eutrophication: terrestrial (mol N-eq ×10 <sup>-2</sup> )                      | 4.8   | 5.4   | 3.9   | 7.6   | 3.9   | 6.2   | 3.9   |
| Human toxicity: cancer effects (CTUh ×10 <sup>-9</sup> )                       | 2.5   | 3.0   | 5.6   | 4.4   | 5.6   | 5.0   | 5.4   |
| Human toxicity: non- cancer effects (CTUh ×10 <sup>-7</sup> )                  | 0.6   | 0.7   | 1.0   | 1.1   | 1.0   | 1.1   | 1.0   |
| Ionising radiation: human health (kBq U <sup>235</sup> -eq)                    | 0.1   | 1.1   | 2.6   | 3.3   | 2.6   | 5.6   | 2.7   |
| Land use (dimensionless)                                                       | 17.8  | 27.3  | 79.0  | 50.3  | 79.0  | 39.1  | 82.6  |
| Resource use: minerals and metals (kg Sb-eq ×10 <sup>-4</sup> )                | 0.3   | 0.5   | 1.5   | 0.9   | 1.5   | 1.2   | 1.4   |
| Ozone depletion (kg CFC-11-eq ×10 <sup>-7</sup> )                              | 1.8   | 2.1   | 2.1   | 3.1   | 2.1   | 3.6   | 2.0   |
| Particulate matter (disease incidence ×10 <sup>-7</sup> )                      | 1.1   | 1.3   | 1.6   | 1.9   | 1.6   | 1.9   | 1.6   |
| Photochemical ozone formation (kg NMVOC-eq ×10 <sup>-2</sup> )                 | 1.6   | 1.7   | 1.1   | 2.2   | 1.1   | 1.9   | 1.0   |
| Water use (m <sup>3</sup> world eq. deprived)                                  | 0.3   | 0.7   | 1.9   | 1.7   | 1.9   | 2.4   | 2.1   |
| Climate change (kg CO <sub>2</sub> -eq)                                        | 13.1  | 12.4  | 0.9   | 11.4  | 0.9   | 7.3   | -1.0  |

Table S40. Environmental impacts of per kg H<sub>2</sub> in the H<sub>2</sub> market of Southeast Asia in three scenarios.

| Environmental impact categories (unit)                                         | STEPS |       |       | APS   |       | NZE   |       |
|--------------------------------------------------------------------------------|-------|-------|-------|-------|-------|-------|-------|
|                                                                                | 2020  | 2030  | 2050  | 2030  | 2050  | 2030  | 2050  |
| Acidification (mol H <sup>+</sup> -eq ×10 <sup>-2</sup> )                      | 1.2   | 1.6   | 1.3   | 2.2   | 1.3   | 2.3   | 1.2   |
| Ecotoxicity: freshwater (CTUe)                                                 | 91.8  | 111.8 | 119.3 | 138.0 | 119.3 | 156.7 | 114.8 |
| Resource use: energy carriers (MJ, net calorific value)                        | 153.5 | 159.6 | 65.9  | 167.5 | 65.9  | 167.3 | 70.0  |
| Eutrophication: aquatic freshwater (kg PO <sub>4</sub> -eq ×10 <sup>-3</sup> ) | 1.9   | 3.1   | 0.9   | 4.7   | 0.9   | 4.1   | 0.7   |
| Eutrophication: aquatic marine (kg N-eq ×10 <sup>-3</sup> )                    | 1.6   | 2.6   | 1.6   | 3.8   | 1.6   | 4.1   | 1.5   |
| Eutrophication: terrestrial (mol N-eq ×10 <sup>-2</sup> )                      | 3.0   | 3.6   | 1.9   | 4.4   | 1.9   | 4.2   | 1.6   |
| Human toxicity: cancer effects (CTUh ×10 <sup>-9</sup> )                       | 1.0   | 1.7   | 4.6   | 2.6   | 4.6   | 3.7   | 4.4   |
| Human toxicity: non- cancer effects (CTUh ×10 <sup>-7</sup> )                  | 0.4   | 0.6   | 1.0   | 0.8   | 1.0   | 1.0   | 0.9   |
| Ionising radiation: human health (kBq U <sup>235</sup> -eq)                    | 0.1   | 0.3   | 0.5   | 0.7   | 0.5   | 1.5   | 0.8   |
| Land use (dimensionless)                                                       | 11.6  | 23.4  | 121.4 | 39.4  | 121.4 | 63.1  | 113.7 |
| Resource use: minerals and metals (kg Sb-eq ×10 <sup>-4</sup> )                | 0.2   | 0.4   | 1.5   | 0.6   | 1.5   | 1.0   | 1.4   |
| Ozone depletion (kg CFC-11-eq ×10 <sup>-7</sup> )                              | 6.1   | 6.1   | 3.6   | 6.1   | 3.6   | 6.4   | 3.7   |
| Particulate matter (disease incidence ×10 <sup>-7</sup> )                      | 0.7   | 1.1   | 1.1   | 1.6   | 1.1   | 1.8   | 1.0   |
| Photochemical ozone formation (kg NMVOC-eq ×10 <sup>-2</sup> )                 | 0.7   | 0.9   | 0.6   | 1.1   | 0.6   | 1.3   | 0.6   |
| Water use (m <sup>3</sup> world eq. deprived)                                  | 0.2   | 1.2   | 2.7   | 2.5   | 2.7   | 4.9   | 3.2   |
| Climate change (kg CO <sub>2</sub> -eq)                                        | 12.4  | 12.4  | 3.4   | 12.3  | 3.4   | 9.0   | 2.1   |

Table S41. Environmental impacts of per kg H<sub>2</sub> in the H<sub>2</sub> market of Rest of Asia Pacific in three scenarios.

| Environmental impact categories (unit)                    | STEPS |       |       | APS   |       | NZE   |       |
|-----------------------------------------------------------|-------|-------|-------|-------|-------|-------|-------|
|                                                           | 2020  | 2030  | 2050  | 2030  | 2050  | 2030  | 2050  |
| Acidification (mol H <sup>+</sup> -eq ×10 <sup>-2</sup> ) | 1.1   | 1.4   | 1.3   | 2.2   | 1.3   | 2.4   | 1.2   |
| Ecotoxicity: freshwater (CTUe)                            | 90.3  | 101.3 | 117.3 | 138.0 | 117.3 | 156.8 | 114.7 |
| Resource use: energy carriers (MJ, net calorific value)   | 152.9 | 156.0 | 65.1  | 167.6 | 65.1  | 167.4 | 69.7  |

|                                                                                |      |      |       |      |       |      |       |
|--------------------------------------------------------------------------------|------|------|-------|------|-------|------|-------|
| Eutrophication: aquatic freshwater (kg PO <sub>4</sub> -eq ×10 <sup>-3</sup> ) | 1.7  | 2.4  | 0.9   | 4.6  | 0.9   | 4.1  | 0.7   |
| Eutrophication: aquatic marine (kg N-eq ×10 <sup>-3</sup> )                    | 1.6  | 2.1  | 1.6   | 3.8  | 1.6   | 4.1  | 1.4   |
| Eutrophication: terrestrial (mol N-eq ×10 <sup>-2</sup> )                      | 2.9  | 3.2  | 1.9   | 4.4  | 1.9   | 4.1  | 1.6   |
| Human toxicity: cancer effects (CTUh ×10 <sup>-9</sup> )                       | 1.0  | 1.4  | 4.6   | 2.6  | 4.6   | 3.7  | 4.5   |
| Human toxicity: non- cancer effects (CTUh ×10 <sup>-7</sup> )                  | 0.4  | 0.5  | 1.0   | 0.8  | 1.0   | 1.0  | 0.9   |
| Ionising radiation: human health (kBq U <sup>235</sup> -eq)                    | 0.1  | 0.2  | 0.5   | 0.7  | 0.5   | 1.6  | 0.8   |
| Land use (dimensionless)                                                       | 11.0 | 18.3 | 122.3 | 39.6 | 122.3 | 63.5 | 113.9 |
| Resource use: minerals and metals (kg Sb-eq ×10 <sup>-4</sup> )                | 0.2  | 0.3  | 1.5   | 0.5  | 1.5   | 1.0  | 1.4   |
| Ozone depletion (kg CFC-11-eq ×10 <sup>-7</sup> )                              | 6.2  | 6.2  | 3.7   | 6.2  | 3.7   | 6.4  | 3.7   |
| Particulate matter (disease incidence ×10 <sup>-7</sup> )                      | 0.6  | 0.9  | 1.0   | 1.6  | 1.0   | 1.8  | 1.0   |
| Photochemical ozone formation (kg NMVOC-eq ×10 <sup>-2</sup> )                 | 0.7  | 0.8  | 0.6   | 1.1  | 0.6   | 1.3  | 0.6   |
| Water use (m <sup>3</sup> world eq. deprived)                                  | 0.2  | 0.8  | 2.7   | 2.6  | 2.7   | 5.0  | 3.2   |
| Climate change (kg CO <sub>2</sub> -eq)                                        | 12.2 | 12.1 | 3.3   | 12.2 | 3.3   | 9.0  | 2.1   |

Table S42. Environmental impacts of per kg H<sub>2</sub> in the H<sub>2</sub> market of Middle East in three scenarios.

| Environmental impact categories (unit)                                         | STEPS |       |       | APS   |       | NZE   |       |
|--------------------------------------------------------------------------------|-------|-------|-------|-------|-------|-------|-------|
|                                                                                | 2020  | 2030  | 2050  | 2030  | 2050  | 2030  | 2050  |
| Acidification (mol H <sup>+</sup> -eq ×10 <sup>-2</sup> )                      | 0.5   | 0.6   | 1.0   | 0.9   | 1.0   | 1.2   | 1.0   |
| Ecotoxicity: freshwater (CTUe)                                                 | 39.7  | 44.4  | 89.4  | 64.4  | 89.4  | 74.1  | 80.9  |
| Resource use: energy carriers (MJ, net calorific value)                        | 177.1 | 178.7 | 90.1  | 184.0 | 90.1  | 177.3 | 99.7  |
| Eutrophication: aquatic freshwater (kg PO <sub>4</sub> -eq ×10 <sup>-4</sup> ) | 1.9   | 2.1   | 5.4   | 2.4   | 5.4   | 3.5   | 4.7   |
| Eutrophication: aquatic marine (kg N-eq ×10 <sup>-3</sup> )                    | 1.4   | 1.5   | 1.6   | 2.0   | 1.6   | 2.3   | 1.6   |
| Eutrophication: terrestrial (mol N-eq ×10 <sup>-2</sup> )                      | 1.5   | 1.6   | 1.7   | 2.2   | 1.7   | 2.5   | 1.9   |
| Human toxicity: cancer effects (CTUh ×10 <sup>-9</sup> )                       | 1.3   | 1.5   | 3.9   | 2.1   | 3.9   | 2.5   | 3.7   |
| Human toxicity: non- cancer effects (CTUh ×10 <sup>-8</sup> )                  | 2.7   | 3.1   | 8.5   | 4.6   | 8.5   | 5.5   | 7.5   |
| Ionising radiation: human health (kBq U <sup>235</sup> -eq)                    | 1.1   | 1.1   | 0.7   | 1.1   | 0.7   | 1.0   | 0.7   |
| Land use (dimensionless)                                                       | 2.6   | 5.8   | 110.7 | 19.4  | 110.7 | 31.1  | 102.9 |
| Resource use: minerals and metals (kg Sb-eq ×10 <sup>-4</sup> )                | 0.2   | 0.3   | 1.3   | 0.5   | 1.3   | 0.7   | 1.1   |
| Ozone depletion (kg CFC-11-eq ×10 <sup>-7</sup> )                              | 4.7   | 5.0   | 3.2   | 6.2   | 3.2   | 6.5   | 3.3   |
| Particulate matter (disease incidence ×10 <sup>-7</sup> )                      | 0.7   | 0.7   | 1.1   | 0.9   | 1.1   | 1.0   | 1.1   |
| Photochemical ozone formation (kg NMVOC-eq ×10 <sup>-2</sup> )                 | 3.2   | 3.2   | 1.8   | 3.0   | 1.8   | 2.9   | 2.0   |
| Water use (m <sup>3</sup> world eq. deprived)                                  | 0.2   | 0.3   | 0.7   | 0.6   | 0.7   | 0.8   | 0.7   |
| Climate change (kg CO <sub>2</sub> -eq)                                        | 12.3  | 12.2  | 4.6   | 11.9  | 4.6   | 9.3   | 3.1   |

Table S43. Environmental impacts of per kg H<sub>2</sub> in the H<sub>2</sub> market of Russia in three scenarios.

| Environmental impact categories (unit)                                         | STEPS |       |       | APS   |       | NZE   |       |
|--------------------------------------------------------------------------------|-------|-------|-------|-------|-------|-------|-------|
|                                                                                | 2020  | 2030  | 2050  | 2030  | 2050  | 2030  | 2050  |
| Acidification (mol H <sup>+</sup> -eq ×10 <sup>-2</sup> )                      | 0.9   | 0.8   | 1.3   | 0.8   | 1.3   | 7.1   | 1.8   |
| Ecotoxicity: freshwater (CTUe)                                                 | 110.2 | 108.7 | 133.9 | 108.4 | 133.9 | 247.4 | 154.4 |
| Resource use: energy carriers (MJ, net calorific value)                        | 185.2 | 183.7 | 132.2 | 183.1 | 132.2 | 315.8 | 106.7 |
| Eutrophication: aquatic freshwater (kg PO <sub>4</sub> -eq ×10 <sup>-4</sup> ) | 3.2   | 2.3   | 5.5   | 2.3   | 5.5   | 3.6   | 7.    |
| Eutrophication: aquatic marine (kg N-eq ×10 <sup>-3</sup> )                    | 2.3   | 2.2   | 2.7   | 2.2   | 2.7   | 8.1   | 3.4   |
| Eutrophication: terrestrial (mol N-eq ×10 <sup>-2</sup> )                      | 2.    | 2.4   | 2.8   | 2.4   | 2.8   | 8.0   | 3.9   |

|                                                                |      |      |      |      |      |      |      |
|----------------------------------------------------------------|------|------|------|------|------|------|------|
| Human toxicity: cancer effects (CTUh $\times 10^{-9}$ )        | 2.6  | 2.6  | 4.8  | 2.6  | 4.8  | 6.4  | 6.5  |
| Human toxicity: non- cancer effects (CTUh $\times 10^{-7}$ )   | 0.3  | 0.3  | 0.9  | 0.3  | 0.9  | 1.4  | 1.2  |
| Ionising radiation: human health (kBq U <sup>235</sup> -eq)    | 1.3  | 1.2  | 2.0  | 1.2  | 2.0  | 6.7  | 3.5  |
| Land use (dimensionless)                                       | 5.2  | 6.8  | 23.2 | 9.1  | 23.2 | 15.5 | 80.9 |
| Resource use: minerals and metals (kg Sb-eq $\times 10^{-4}$ ) | 0.3  | 0.3  | 1.2  | 0.3  | 1.2  | 1.3  | 1.8  |
| Ozone depletion (kg CFC-11-eq $\times 10^{-6}$ )               | 1.4  | 1.4  | 0.9  | 1.4  | 0.9  | 1.6  | 0.5  |
| Particulate matter (disease incidence $\times 10^{-7}$ )       | 0.8  | 0.8  | 1.6  | 0.8  | 1.6  | 3.2  | 2.6  |
| Photochemical ozone formation (kg NMVOC-eq $\times 10^{-2}$ )  | 2.7  | 2.7  | 2.0  | 2.7  | 2.0  | 4.4  | 1.5  |
| Water use (m <sup>3</sup> world eq. deprived)                  | 0.4  | 0.3  | 1.6  | 0.3  | 1.6  | 4.0  | 2.9  |
| Climate change (kg CO <sub>2</sub> -eq)                        | 12.6 | 12.3 | 5.9  | 11.7 | 5.9  | 15.7 | -0.1 |

Table S44. Environmental impacts of per kg H<sub>2</sub> in the H<sub>2</sub> market of Rest of Eurasia in three scenarios.

| Environmental impact categories (unit)                                        | STEPS |       |       | APS   |       | NZE   |       |
|-------------------------------------------------------------------------------|-------|-------|-------|-------|-------|-------|-------|
|                                                                               | 2020  | 2030  | 2050  | 2030  | 2050  | 2030  | 2050  |
| Acidification (mol H <sup>+</sup> -eq $\times 10^{-2}$ )                      | 0.9   | 5.2   | 1.5   | 7.8   | 1.5   | 7.5   | 1.8   |
| Ecotoxicity: freshwater (CTUe)                                                | 110.2 | 175.5 | 148.5 | 213.1 | 148.5 | 255.8 | 154.3 |
| Resource use: energy carriers (MJ, net calorific value)                       | 185.2 | 233.3 | 108.4 | 259.0 | 108.4 | 323.8 | 106.8 |
| Eutrophication: aquatic freshwater (kg PO <sub>4</sub> -eq $\times 10^{-3}$ ) | 0.3   | 2.7   | 0.7   | 4.3   | 0.7   | 3.8   | 0.8   |
| Eutrophication: aquatic marine (kg N-eq $\times 10^{-3}$ )                    | 2.3   | 5.3   | 2.9   | 7.0   | 2.9   | 8.5   | 3.4   |
| Eutrophication: terrestrial (mol N-eq $\times 10^{-2}$ )                      | 2.5   | 5.3   | 3.0   | 6.8   | 3.0   | 8.4   | 3.9   |
| Human toxicity: cancer effects (CTUh $\times 10^{-9}$ )                       | 2.6   | 4.0   | 6.0   | 4.8   | 6.0   | 6.6   | 6.5   |
| Human toxicity: non- cancer effects (CTUh $\times 10^{-7}$ )                  | 0.3   | 0.8   | 1.2   | 1.1   | 1.2   | 1.4   | 1.2   |
| Ionising radiation: human health (kBq U <sup>235</sup> -eq)                   | 1.3   | 2.7   | 2.4   | 3.7   | 2.4   | 7.0   | 3.5   |
| Land use (dimensionless)                                                      | 5.2   | 10.7  | 23.3  | 14.8  | 23.3  | 16.0  | 80.8  |
| Resource use: minerals and metals (kg Sb-eq $\times 10^{-4}$ )                | 0.3   | 0.6   | 1.7   | 0.8   | 1.7   | 1.3   | 1.8   |
| Ozone depletion (kg CFC-11-eq $\times 10^{-6}$ )                              | 1.4   | 1.5   | 0.7   | 1.4   | 0.7   | 1.6   | 0.5   |
| Particulate matter (disease incidence $\times 10^{-7}$ )                      | 0.8   | 2.0   | 2.1   | 2.5   | 2.1   | 3.3   | 2.6   |
| Photochemical ozone formation (kg NMVOC-eq $\times 10^{-2}$ )                 | 2.7   | 3.5   | 1.6   | 3.9   | 1.6   | 4.5   | 1.5   |
| Water use (m <sup>3</sup> world eq. deprived)                                 | 0.4   | 1.7   | 2.2   | 2.5   | 2.2   | 4.2   | 2.8   |
| Climate change (kg CO <sub>2</sub> -eq)                                       | 12.6  | 15.4  | 4.6   | 16.6  | 4.6   | 16.1  | -0.1  |

## 4.2 Cumulative GHG emissions of H<sub>2</sub> production

As shown in Figure S2, in the STESP, APS and NZE scenarios, China emits 16 Gt CO<sub>2</sub>-eq, 14 Gt CO<sub>2</sub>-eq, and 15 Gt CO<sub>2</sub>-eq GHG emissions from 2020 to 2050. Although China will produce four times more H<sub>2</sub> in 2050 in the NZE scenario compared to the STEPS scenario, the cumulative GHG emissions between 2020 and 2050 in the NZE can be lower than that in the STEPS due to the large-scale use of water electrolysis. In the USA, these cumulative emissions in these scenarios will be 3.9 Gt CO<sub>2</sub>-eq, 5.2 Gt CO<sub>2</sub>-eq, and 6.1 Gt CO<sub>2</sub>-eq. The H<sub>2</sub> demand in the USA in 2050 in the NZE scenario is close to that in China. However, since the US has a lower emission intensity of electricity, the cumulative GHG emissions are lower than China.

Contrary to the decreasing trend of H<sub>2</sub> production in the STEPS scenario, the EU is expected to produce more H<sub>2</sub> in the APS and NZE scenarios. In the EU, the cumulative GHG emissions of H<sub>2</sub> production will be 1.6 Gt CO<sub>2</sub>-eq, 2.4 Gt CO<sub>2</sub>-eq, and 3.1 Gt CO<sub>2</sub>-eq in three scenarios. The high increase of H<sub>2</sub> production in the APS and NZE scenarios makes the cumulative GHG emissions in these scenarios higher than those in the STEPS scenario. The overall H<sub>2</sub> production related GHG emissions of China, the USA and the EU in the NZE scenario could use 2.5-8.6%, 1.0-3.4% and 0.5-1.7% of the residual carbon budget between 2020 and 2050 to limit global warming to 1.5°C with 67% certainty.<sup>42</sup> Overall, in the NZE scenario, the cumulative GHG emissions of H<sub>2</sub> production in most regions will always be higher than in the STEPS scenario. Their H<sub>2</sub> production mixes in the NZE scenario need a more significant and faster transition to reverse this trend.

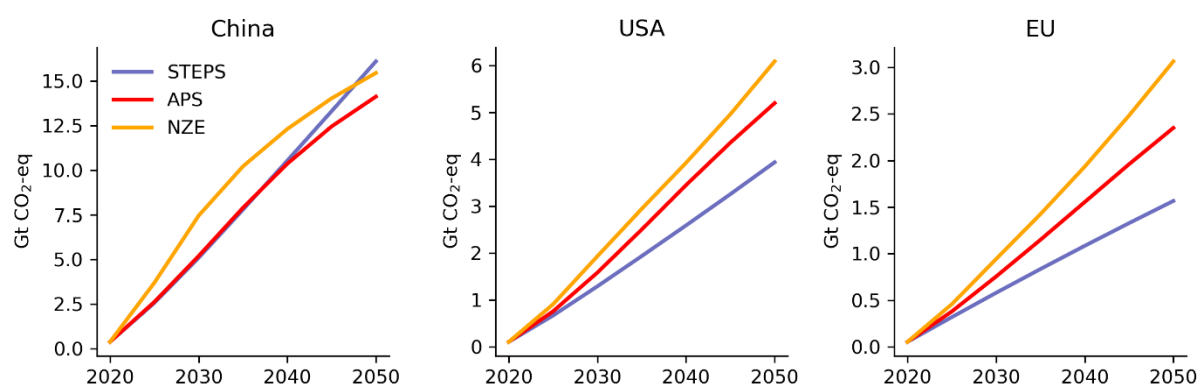

Figure S2. The cumulative GHG emissions of H<sub>2</sub> production in China, USA and EU in three scenarios.

### 4.3 Sensitivity analysis

This sensitivity analysis assumes the use of dedicated renewable electricity generation from solar photovoltaic (PV), on-shore wind, and hydropower, as currently planned and listed in IEA's H<sub>2</sub> production projects database.<sup>43</sup> We modeled these as the electricity source for water electrolysis. The proportion of H<sub>2</sub> production amount of water electrolysis powered by renewable electricity in water electrolysis is further assumed as 100% to quantify their impacts on the global and regional cumulative GHG emissions of H<sub>2</sub> production by 2050. In addition, NG SMR CCS is further assumed to be replaced by water electrolysis powered by 100% renewables to quantify the GHG emissions reduction potential of radically transitioning H<sub>2</sub> production to green H<sub>2</sub> technologies.

As shown in Figure S3, the 100% renewable electricity-powered water electrolysis and its substitution for NG SMR CCS have a limited impact on cumulative GHG emissions of H<sub>2</sub> production at regional and global levels in the STEPS scenario (declining 3.5% at the most). STEPS assumes a limited amount of H<sub>2</sub> production from water electrolysis and NG CCS. As water electrolysis plays a more critical role in the APS and NZE scenarios, the impact of the electricity source of water electrolysis on cumulative GHG emissions by 2050 becomes more significant. In the APS scenario, the global cumulative GHG emissions of H<sub>2</sub> production by 2050 can decrease by 5.4-10.9%, if 100% of electricity from renewable sources are used in water electrolysis. Using water electrolysis powered

100% renewables to further replace NG SMR CCS, the cumulative GHG emissions of H<sub>2</sub> production can be reduced by 10.8%-18.0%. In the NZE scenario, the global cumulative GHG emissions of H<sub>2</sub> production by 2050 can decrease by 9.8-21.9% and 30.7-49.8% corresponding to these two assumptions. Unlike in China and the USA, the scale-up of water electrolysis using dedicated electricity from solar PV will not cause a significant decrease in cumulative GHG emissions of H<sub>2</sub> production by 2050 in the EU. The EU will decarbonize its electricity production quicker than China and the USA. In the EU, only on-shore wind and hydropower can help water electrolysis to decarbonize further as its grid electricity will move relatively quickly to low carbon emissions. In the USA, the dedicated renewable has a very limited potential to help water electrolysis to decarbonize further due to the adoption of BECCS in its grid electricity.

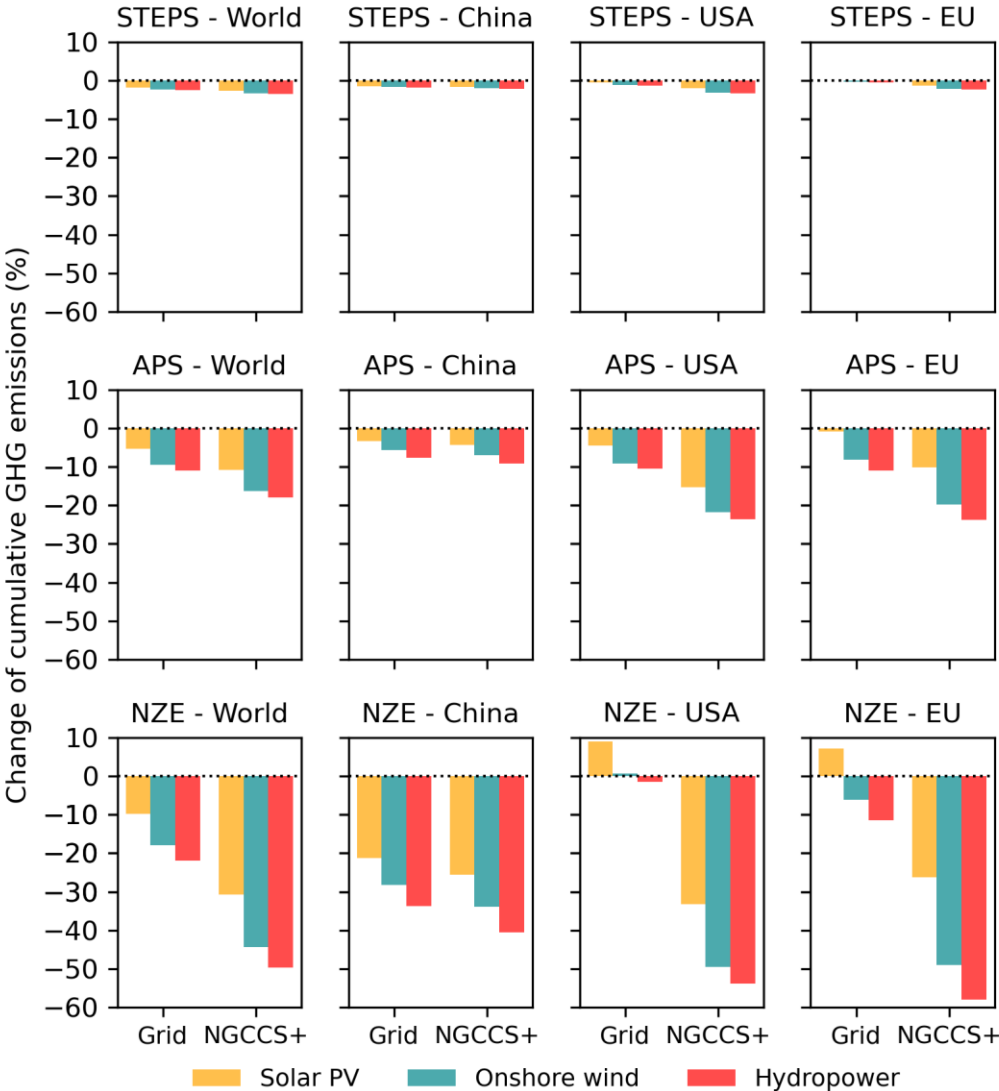

Figure S3. Sensitivity analysis. This figure shows the relative change of global and regional cumulative GHG emissions of H<sub>2</sub> production by 2050 caused by 100% renewable electricity-powered water electrolysis and its further substitution for NG SMR CCS. The “NGCCS+” refers to the grid-connected water electrolysis and NG SMR CCS.

## References

1. A. Wokaun and E. Wilhelm, *Transition to Hydrogen: Pathways toward Clean Transportation*, Cambridge University Press, Cambridge, 2011.
2. NREL, Current Hydrogen from Coal without CO<sub>2</sub> Capture and Sequestration, <https://www.nrel.gov/hydrogen/assets/docs/current-central-coal-without-co2-sequestration-v2-1-1.xls>, (accessed 4th May, 2022).
3. NREL, Current Central Hydrogen from Coal with CO<sub>2</sub> Capture and Sequestration, <https://www.nrel.gov/hydrogen/h2a-production-models.html>, (accessed 4th May, 2022).
4. K. Volkart, C. Bauer and C. Boulet, *International Journal of Greenhouse Gas Control*, 2013, **16**, 91-106.
5. C. Antonini, K. Treyer, A. Streb, M. van der Spek, C. Bauer and M. Mazzotti, *Sustainable Energy & Fuels*, 2020, **4**, 2967-2986.
6. C. Antonini, K. Treyer, E. Moioli, C. Bauer, T. J. Schildhauer and M. Mazzotti, *Sustainable Energy & Fuels*, 2021, **5**, 2602-2621.
7. D. Hospital-Benito, I. Díaz and J. Palomar, *Sustainable Production and Consumption*, 2023, **38**, 283-294.
8. N. Gerloff, *Journal of Energy Storage*, 2021, **43**, 102759.
9. R. E. Lester, D. Gunasekera, W. Timms and D. Downie, *Water requirements for use in hydrogen production in Australia: Potential public policy and industry-related issues*, Deakin University, 2022.
10. IRENA, *Green Hydrogen Cost Reduction: Scaling up Electrolysers to Meet the 1.5°C Climate Goal*, International Renewable Energy Agency, Abu Dhabi, 2020.
11. K. Bareiß, C. de la Rúa, M. Möckl and T. Hamacher, *Applied Energy*, 2019, **237**, 862-872.
12. A. Simons and C. Bauer, *Applied Energy*, 2015, **157**, 884-896.
13. ProBas, Umweltbundesamt, Umweltaspekte von Iridium, (accessed 13th, March, 2022).
14. FCE, *FuelCell Energy Announces Solid Oxide Electrolysis and Fuel Cell Platform to Improve Control and Flexibility of Energy Investments*, FuelCell Energy, Inc., 2022.
15. I. Staffell, A. Ingram and K. Kendall, *International Journal of Hydrogen Energy*, 2012, **37**, 2509-2523.
16. T. Smolinka, M. Günther, J. Garche, F.-I. f. S. Energiesysteme, F. Cell and B. C.-. FCBAT, *Stand und Entwicklungspotenzial der Wasserelektrolyse zur Herstellung von Wasserstoff aus regenerativen Energien: NOW-Studie : Kurzfassung des Abschlussberichts*, Fraunhofer ISE, 2011.
17. X. Zhang, C. Bauer, C. L. Mutel and K. Volkart, *Applied Energy*, 2017, **190**, 326-338.
18. BEIS, *KEW H<sub>2</sub>: ZERO-CARBON BULK SUPPLY*, Department for Business, Energy & Industrial Strategy, 2019.
19. H. C. S. GmbH, Indoor Electrolyser HydroCab 5kg H<sub>2</sub>/Day, <https://hyfindr.com/marketplace/systems/electrolysers/aem-electrolysers/indoor-electrolyser-hydrocab-5kg-h2-day/>, (accessed 5th, June, 2023).
20. Enapter, Technical Presentation - The AEM Electrolyser, (accessed 5th, June, 2023).
21. elogen, *Elogen\_Product\_sheet-Elyte260*, 2023.
22. H. Titanium, PEM Electrolyzer, <https://heletitanium.com/titanium-anode/pem-electrolyzer/>, (accessed 8th, June, 2023).
23. S. Häfele, M. Hauck and J. Dailly, *International Journal of Hydrogen Energy*, 2016, **41**, 13786-13796.
24. F. Petipas, A. Brisse and C. Bouallou, *Journal of Power Sources*, 2013, **239**, 584-595.
25. J. Sanz-Bermejo, J. Muñoz-Antón, J. Gonzalez-Aguilar and M. Romero, *International Journal of Hydrogen Energy*, 2015, **40**, 8291-8303.
26. P. Colombo, A. Saeedmanesh, M. Santarelli and J. Brouwer, *Energy Conversion and Management*, 2020, **204**, 112322.

27. ISPT, *Next Level Solid Oxide Electrolysis: Upscaling potential and techno-economical evaluation for 3 industrial use cases*, Institute for Sustainable Process Technology, 2023.
28. IEA, *Africa Energy Outlook 2022*, International Energy Agency, Paris, 2022.
29. IEA, *World Energy Outlook 2022*, International Energy Agency, Paris, 2022.
30. Advisian, *Australian hydrogen market study*, Brisbane, 2021.
31. IEA, *Global Hydrogen Review 2021*, International Energy Agency, Paris, 2021.
32. AE, Hydrogen calculation, [https://atomicexpert.com/vodorod\\_po\\_raschetu](https://atomicexpert.com/vodorod_po_raschetu), (accessed 11th October, 2022).
33. GEA, Kuzbass in Siberia launches hydrogen production, <https://globalenergyprize.org/en/2021/09/22/kuzbass-in-siberia-launches-hydrogen-production/>, (accessed 11th November, 2022).
34. I. Dincer, *Comprehensive energy systems*, Elsevier, 2018.
35. IEA, *Global Hydrogen Review 2022*, International Energy Agency, Paris, 2022.
36. O. Schmidt, A. Gambhir, I. Staffell, A. Hawkes, J. Nelson and S. Few, *International Journal of Hydrogen Energy*, 2017, **42**, 30470-30492.
37. IEA, *The Future of Hydrogen - Seizing today's opportunities*, International Energy Agency, 2019.
38. R. Bhandari, C. A. Trudewind and P. Zapp, *Journal of Cleaner Production*, 2014, **85**, 151-163.
39. IEA, *Net Zero by 2050*, International Energy Agency, 2021.
40. IEA, *Global Energy and Climate Model* International Energy Agency, 2022.
41. L. Baumstark, N. Bauer, F. Benke, C. Bertram, S. Bi, C. C. Gong, J. P. Dietrich, A. Dirnaichner, A. Giannousakis, J. Hilaire, D. Klein, J. Koch, M. Leimbach, A. Levesque, S. Madeddu, A. Malik, A. Merfort, L. Merfort, A. Odenweller, M. Pehl, R. C. Pietzcker, F. Piontek, S. Rauner, R. Rodrigues, M. Rottoli, F. Schreyer, A. Schultes, B. Soergel, D. Soergel, J. Strefler, F. Ueckerdt, E. Kriegler and G. Luderer, *Geosci. Model Dev.*, 2021, **14**, 6571-6603.
42. IPCC, *Climate Change 2022: Mitigation of Climate Change*, Intergovernmental Panel on Climate Change, 2022.
43. IEA, *Hydrogen Production Projects Database*, International Energy Agency, Paris, 2022.
